1 **Expanding the diversity of bacterioplankton isolates and modeling isolation efficacy with**  
2 **large scale dilution-to-extinction cultivation**

3  
4  
5  
6  
7  
8  
9  
10  
11  
12  
13  
14  
15  
16  
17  
18  
19  
20  
21  
22  
23  
24  
25  
26  
27  
28  
29  
30  
31  
32  
33  
34  
35  
36  
37  
38  
39  
40  
41  
42  
43  
44  
45  
46

Michael W. Henson<sup>1,#</sup>, V. Celeste Lanclos<sup>1</sup>, David M. Pitre<sup>2</sup>, Jessica Lee Weckhorst<sup>2,†</sup>, Anna M. Lucchesi<sup>2</sup>, Chuankai Cheng<sup>1</sup>, Ben Temperton<sup>3\*</sup>, and J. Cameron Thrash<sup>1\*</sup>

<sup>1</sup>Department of Biological Sciences, University of Southern California, Los Angeles, CA 90089, U.S.A.

<sup>2</sup>Department of Biological Sciences, Louisiana State University, Baton Rouge, LA 70803, U.S.A.

<sup>3</sup>School of Biosciences, University of Exeter, Stocker Road, Exeter, EX4 4QD, U.K.

<sup>#</sup>Current affiliation: Department of Geophysical Sciences, University of Chicago, Chicago, IL 60637, U.S.A.

<sup>†</sup>Current affiliation: Quantitative and Computational Biosciences Program, Baylor College of Medicine, Houston, TX 77030, U.S.A.

\*Correspondence:

J. Cameron Thrash  
[thrash@usc.edu](mailto:thrash@usc.edu)

Ben Temperton  
[b.temperton@exeter.ac.uk](mailto:b.temperton@exeter.ac.uk)

Running title: Evaluation of large-scale DTE cultivation

Keywords: dilution-to-extinction, cultivation, bacterioplankton, LSUCC, microbial ecology, coastal microbiology

47  
48  
49  
50  
51  
52  
53  
54  
55  
56  
57  
58  
59  
60  
61  
62  
63  
64  
65  
66  
67  
68  
69  
70  
71  
72  
73  
74  
75  
76  
77  
78  
79  
80  
81  
82  
83  
84  
85  
86  
87  
88  
89  
90  
91  
92

## Abstract

Cultivated bacterioplankton representatives from diverse lineages and locations are essential for microbiology, but the large majority of taxa either remain uncultivated or lack isolates from diverse geographic locales. We paired large scale dilution-to-extinction (DTE) cultivation with microbial community analysis and modeling to expand the phylogenetic and geographic diversity of cultivated bacterioplankton and to evaluate DTE cultivation success. Here, we report results from 17 DTE experiments totaling 7,820 individual incubations over three years, yielding 328 repeatably transferable isolates. Comparison of isolates to microbial community data of source waters indicated that we successfully isolated 5% of the observed bacterioplankton community throughout the study. 43% and 26% of our isolates matched operational taxonomic units and amplicon single nucleotide variants, respectively, within the top 50 most abundant taxa. Isolates included those from previously uncultivated clades such as SAR11 LD12 and *Actinobacteria* acIV, as well as geographically novel members from other ecologically important groups like SAR11 subclade IIIa, SAR116, and others; providing the first isolates in eight putatively new genera and seven putatively new species. Using a newly developed DTE cultivation model, we evaluated taxon viability by comparing relative abundance with cultivation success. The model i) revealed the minimum attempts required for successful isolation of taxa amenable to growth on our media, and ii) identified possible subpopulation viability variation in abundant taxa such as SAR11 that likely impacts cultivation success. By incorporating viability in experimental design, we can now statistically constrain the effort necessary for successful cultivation of specific taxa on a defined medium.

## Importance

Even before the coining of the term “great plate count anomaly” in the 1980s, scientists had noted the discrepancy between the number of microorganisms observed under the microscope and the number of colonies that grew on traditional agar media. New cultivation approaches have reduced this disparity, resulting in the isolation of some of the “most wanted” bacterial lineages. Nevertheless, the vast majority of microorganisms remain uncultured, hampering progress towards answering fundamental biological questions about many important microorganisms. Furthermore, few studies have evaluated the underlying factors influencing cultivation success, limiting our ability to improve cultivation efficacy. Our work details the use of dilution-to-extinction (DTE) cultivation to expand the phylogenetic and geographic diversity of available axenic cultures. We also provide a new model of the DTE approach that uses cultivation results and natural abundance information to predict taxon-specific viability and iteratively constrain DTE experimental design to improve cultivation success.

## 93 Introduction

94 Axenic cultures of environmentally important microorganisms are critical for  
95 fundamental microbiological investigation, including generating physiological information about  
96 environmental tolerances, determining organismal-specific metabolic and growth rates, testing  
97 hypotheses generated from *in situ* 'omics observations, and experimentally examining microbial  
98 interactions. Research using important microbial isolates has been critical to a number of  
99 discoveries such as defining microorganisms involved in surface ocean methane saturation (1–3),  
100 the role of proteorhodopsin in maintaining cellular functions during states of carbon starvation  
101 (4, 5), the complete nitrification of ammonia within a single organism (6), and identifying novel  
102 metabolites and antibiotics (7–10). However, the vast majority of taxa remain uncultivated (11–  
103 13), restricting valuable experimentation on such topics as genes of unknown function, the role  
104 of analogous gene substitutions in overcoming auxotrophy, and the multifaceted interactions  
105 occurring in the environment inferred from sequence data (11, 14–16).

106 The quest to bring new microorganisms into culture, and the recognition that traditional  
107 agar-plate based approaches have limited success (17–19), have compelled numerous  
108 methodological advances spanning a wide variety of techniques like diffusion chambers,  
109 microdroplet encapsulation, and slow acclimatization of cells to artificial media (20–25).  
110 Dilution-to-extinction (DTE) cultivation using sterile seawater as the medium has also proven  
111 highly successful for isolating bacterioplankton (26–32). Pioneered by Don Button and  
112 colleagues for the cultivation of oligotrophic bacteria, this method essentially pre-isolates  
113 organisms after serial dilution by separating individual or small groups of cells into their own  
114 incubation vessel (32, 33). This prevents slow-growing, obligately oligotrophic bacterioplankton  
115 from being outcompeted by faster-growing organisms, as would occur in enrichment-based  
116 isolation methods like those that would target aerobic heterotrophs. It is also a practical method  
117 for taxa that cannot grow on solid media. Natural seawater media provide these taxa with the  
118 same chemical surroundings from which they are collected, reducing the burden of anticipating  
119 all the relevant compounds required for growth (33).

120 Improvements to DTE cultivation in multiple labs have increased the number of  
121 inoculated wells and decreased the time needed to detect growth (26, 28, 34), thereby earning the  
122 moniker “high-throughput culturing” (26, 28). We (35) and others (30) have also adapted DTE  
123 culturing by incorporating artificial media in place of natural seawater media to successfully  
124 isolate abundant bacterioplankton. Thus far, DTE culturing has led to isolation of many  
125 numerically abundant marine and freshwater groups such as marine SAR11 *Alphaproteobacteria*  
126 (28, 29, 34–36), the freshwater SAR11 LD12 clade (29), SUP05/Arctic96BD-19  
127 *Gammaproteobacteria* (37–39), OM43 *Betaproteobacteria* (26, 27, 31, 40, 41), HIMB11-Type  
128 *Roseobacter* spp. (35, 42), numerous so-called Oligotrophic Marine *Gammaproteobacteria* (43),  
129 and acI *Actinobacteria* (44).

130 Despite the success of DTE cultivation, many taxa continue to elude domestication (11–  
131 13, 16). Explanations include a lack of required nutrients or growth factors in media (20, 45–49)  
132 and biological phenomena such as dormancy and/or phenotypic heterogeneity within populations  
133 (47, 48, 50–56). However, there have been few studies empirically examining the factors  
134 underlying isolation success in DTE cultivation experiments (34, 57, 58), restricting our ability  
135 to determine the relative importance of methodological vs. biological influences on cultivation  
136 reliability for any given organism. Moreover, even for those taxa that we have successfully  
137 cultivated, in many cases we lack geographically diverse strains, restricting comparisons of the  
138 phenotypic and genomic diversity that may influence taxon-specific cultivability.

139 We undertook a three-year cultivation effort in the coastal northern Gulf of Mexico  
140 (nGOM), from which we lack representatives of many common bacterioplankton groups, to  
141 provide new model organisms for investigating microbial function, ecology, biogeography, and  
142 evolution. Simultaneously, we paired our cultivation efforts with 16S rRNA gene amplicon  
143 analyses to compare cultivation results with the microbial communities in the source waters. We  
144 have previously reported on the success of our artificial media in obtaining abundant taxa over  
145 the course of the first seven experiments from this campaign (35). Here, we expand our report to  
146 include cultivation results from a total of seventeen experiments, and update the classic viability  
147 calculations of Button *et al.* (33) with a new model to estimate the viability of individual taxa  
148 using relative abundance information. New isolates belonged to cultivated groups in eight  
149 putatively novel genera and seven putatively novel species in previously cultivated genera and  
150 expanded cultured geographic representation for many important clades like SAR11.  
151 Additionally, using model-based predictions, we identified possible taxon-specific viability  
152 variation that can influence cultivation success. By incorporating these new viability estimates  
153 into the model, our method facilitates statistically-informed experimental design for targeting  
154 individual taxa, thereby reducing uncertainty for future culturing work (59).

155

## 156 **Material and Methods**

157

### 158 *Sampling*

159 Surface water samples were collected at six different sites once a year for three years, except for  
160 Terrebonne Bay, which was collected twice. The sites sampled were Lake Borgne (LKB; Shell  
161 Beach, LA), Bay Pomme d'Or (JLB; Buras, LA), Terrebonne Bay (TBON; Cocodrie, LA),  
162 Atchafalaya River Delta (ARD; Franklin, LA), Freshwater City (FWC; Kaplan, LA), and  
163 Calcasieu Jetties (CJ; Cameron, LA) (lat/long coordinates provided in Table S1). Water  
164 collection for biogeochemical and biological analysis followed the protocol in (35). Briefly, we  
165 collected surface water in a sterile, acid-washed polycarbonate bottle. Duplicate 120 ml water  
166 samples were filtered serially through 2.7  $\mu\text{m}$  Whatman GF/D (GE Healthcare, Little Chalfort,  
167 UK) and 0.22  $\mu\text{m}$  Sterivex (Millipore, Massachusetts, USA) filters and placed on ice until  
168 transferred to  $-20^{\circ}\text{C}$  in the laboratory (maximum 3 hours on ice). The University of Washington  
169 Marine Chemistry Laboratory analyzed duplicate subsamples of 50 ml 0.22  $\mu\text{m}$ -filtered water  
170 collected in sterile 50 ml falcon tubes (VWR, Pennsylvania, USA) for concentrations of  $\text{SiO}_4$ ,  
171  $\text{PO}_4^{3-}$ ,  $\text{NH}_4^+$ ,  $\text{NO}_3^-$ , and  $\text{NO}_2^-$ . Samples for cell counts were filtered through a 2.7  $\mu\text{m}$  GF/D filter,  
172 fixed with 10% formaldehyde, and stored on ice until enumeration (maximum 3 hours).  
173 Temperature, salinity, pH, and dissolved oxygen were measured using a handheld YSI 556  
174 multiprobe system (YSI Inc., Ohio, USA). All metadata is available in Table S1.

175

### 176 *Dilution-to-extinction culturing and propagation*

177 Isolation, propagation, and identification of isolates were completed as previously reported (29,  
178 35, 60). A subsample of 2.7  $\mu\text{m}$  filtered surface water was stained with 1X SYBR Green (Lonza,  
179 Basal, Switzerland) using a repeat pipettor and disposal tip (Gilson, Wisconsin, USA), and  
180 enumerated using a Guava EasyCyte 5HT HPL flow cytometer (Millipore, Massachusetts, USA)  
181 as described (60). After serial dilution to a predicted  $1\text{-}3\text{ cells}\cdot\mu\text{l}^{-1}$ , 2  $\mu\text{l}$  water was inoculated into  
182 five, 2 mL 96-well PTFE plates (Radleys, Essex, UK) containing 1.7 ml artificial seawater  
183 medium (Table S1) using a 20  $\mu\text{L}$  multichannel pipet (Gilson, Wisconsin, USA) to achieve an  
184 estimated  $1\text{-}3\text{ cells}\cdot\text{well}^{-1}$  (Table 1). The salinity of the medium was chosen to match *in situ*

185 salinity after experiment JLB (January 2015) (Tables 1, S1). After year two, a second generation  
186 of media, designated MWH, was designed to incorporate additional important osmolytes,  
187 reduced sulfur compounds, and other constituents (Tables 1, S1) potentially necessary for *in*  
188 *vitro* growth of uncultivated clades (49, 61–67). The four corner wells of each plate were left  
189 uninoculated as negative controls for every experiment. Plates were covered using sterile, PTFE-  
190 coated silicon 96-well plate mats (Thermo Scientific, Massachusetts, USA). Cultures were  
191 incubated at *in situ* temperatures (Table S1) in the dark for three to six weeks and evaluated for  
192 positive growth ( $> 10^4$  cells·ml<sup>-1</sup>) by flow cytometry. 200 µl from positive wells was transferred  
193 using a 200 µL single channel pipet (Gilson, Wisconsin, USA) to duplicate 125 ml  
194 polycarbonate flasks (Corning, New York, USA) containing 50 ml of medium (29, 35, 60). At  
195 FWC, FWC2, JLB2c, and JLB3, not all positive wells were transferred because of the large  
196 number of positive wells. At each site, 48/301, 60/403, 60/103, and 60/146 of the positive wells  
197 were transferred, respectively, selected using flow cytometry signatures with  $< 10^2$  green  
198 fluorescence and  $< 10^2$  side scatter that maximized our chances of isolating small  
199 microorganisms that encompass many of the most abundant and most wanted taxa, like SAR11,  
200 using our settings (60).

#### 201 202 *Culture identification*

203 Cultures reaching  $\geq 1 \times 10^5$  cells·ml<sup>-1</sup> had 35 ml of the 50 ml volume filtered for identification  
204 via 16S rRNA gene PCR onto 25 mm 0.22-µm polycarbonate filters (Millipore, Massachusetts,  
205 USA). DNA extractions were performed using the MoBio PowerWater DNA kit (QIAGEN,  
206 Massachusetts, USA) following the manufacturer's instructions and eluted in sterile water. The  
207 16S rRNA gene was amplified as previously reported in Henson et al. 2016 (35) and sequenced  
208 at Michigan State University Research Technology Support Facility Genomics Core. Evaluation  
209 of Sanger sequence quality was performed with 4Peaks (v. 1.7.1)  
210 (<http://nucleobytes.com/4peaks/>) and forward and reverse complement sequences (converted via  
211 [http://www.bioinformatics.org/sms/rev\\_comp.html](http://www.bioinformatics.org/sms/rev_comp.html)) were assembled where overlap was  
212 sufficient using the CAP3 web server (<http://doua.prabi.fr/software/cap3>).

213  
214 *Community iTag sequencing, operational taxonomic units, and single nucleotide variants*  
215 Sequentially filtered (2.7µm, 0.22µm) duplicate samples were extracted and analyzed using our  
216 previously reported protocols and settings (35, 68). We sequenced the 2.7-0.22 µm fraction for  
217 this study because this fraction corresponded with the  $< 2.7$  µm communities that were used for  
218 the DTE experiments. To avoid batch sequencing effects, DNA from the first seven collections  
219 reported in (35) was resequenced with the additional samples from this study (FWC2 and after-  
220 Table 1). We targeted the 16S rRNA gene V4 region with the 515F, 806RB primer set (that  
221 corrects for poor amplification of taxa like SAR11) (69, 70) using Illumina MiSeq 2 x 250bp  
222 paired-end sequencing at Argonne National Laboratories, resulting in 2,343,106 raw reads for  
223 the 2.7-0.22 µm fraction. Using Mothur v1.33.3 (71), we clustered 16S rRNA gene amplicons  
224 into distinctive OTUs with a 0.03 dissimilarity threshold (OTU<sub>0.03</sub>) and classified them according  
225 to the Silva v119 database (72, 73). After these steps, 55,256 distinct OTU<sub>0.03</sub> remained. We  
226 also used minimum entropy decomposition (MED) to partition reads into fine-scale amplicon  
227 single nucleotide variants (ASVs) (74). Reads were first analyzed using Mothur as described  
228 above up to the *screen.seqs()* command. The cleaned reads fasta file was converted to MED-  
229 compatible headers with the 'mothur2oligo' tool renamer.pl from the functions in MicrobeMiseq  
230 (<https://github.com/DenefLab/MicrobeMiseq>) (75) using the fasta output from *screen.seqs()* and



231 the Mothur group file. These curated reads were analyzed using MED (v. 2.1) with the flags -M  
232 60, and -d 1. MED resulted in 2,813 refined ASVs. ASVs were classified in Mothur using  
233 *classify.seqs()*, the Silva v119 database, and a cutoff bootstrap value of 80% (76). After  
234 classification, we removed ASVs identified as “chloroplast”, “mitochondria”, or “unknown”  
235 from the dataset.

236

### 237 *Community analyses*

238 OTU (OTU<sub>0.03</sub>) and ASV abundances were analyzed within the R statistical environment v.3.2.1  
239 (77) following previously published protocols (29, 35, 68). Using the package PhyloSeq (78),  
240 OTUs and ASVs were rarefied using the command *rarefy\_even\_depth()* and OTUs/ASVs  
241 without at least two reads in four of the 34 samples (2 sites; ~11%) were removed. This latter  
242 cutoff was used to remove potentially spurious OTUs/ASVs resulting from sequencing errors.  
243 Our modified PhyloSeq scripts are available on our GitHub repository [https://github.com/thrash-](https://github.com/thrash-lab/Modified-Phyloseq)  
244 [lab/Modified-Phyloseq](https://github.com/thrash-lab/Modified-Phyloseq). After filtering, the datasets contained 777 unique OTUs and 1,323  
245 unique ASVs (Table S1). For site-specific community comparisons, beta diversity between sites  
246 was examined using Bray-Curtis distances via ordination with non-metric multidimensional  
247 scaling (NMDS) (Table S1). The nutrient data were normalized using the R function *scale* which  
248 subtracts the mean and divides by the standard deviation for each column. The influence of the  
249 transformed environmental parameters on beta diversity was calculated in R with the *envfit*  
250 function. Relative abundances of an OTU or ASV from each sample were calculated as the  
251 number of reads over the sum of all the reads in that sample. The relative abundance was then  
252 averaged between biological duplicates for a given OTU or ASV. To determine the best  
253 matching OTU or ASV for a given LSUCC isolate, the OTU representative fasta file, provided  
254 by Mothur using *get.oturep()*, and the ASV fasta file were used to create a BLAST database  
255 (*makeblastdb*) against which the LSUCC isolate 16S rRNA genes could be searched via *blastn*  
256 (BLAST v 2.2.26) (“OTU\_ASVrep\_db” - Available as Supplemental Information at  
257 <https://doi.org/10.6084/m9.figshare.12142098>). We designated a LSUCC isolate 16S rRNA gene  
258 match with an OTU or ASV sequence based on  $\geq 97\%$  or  $\geq 99\%$  sequence identity, respectively,  
259 as well as a  $\geq 247$  bp alignment.

260

### 261 *16S rRNA gene phylogeny*

262 Taxa in the *Alpha-*, *Beta-*, and *Gammaproteobacteria* phylogenies from (35) served as the  
263 backbone for the trees in the current work. For places in these trees with poor representation near  
264 isolate sequences, additional taxa were selected by searching the 16S rRNA genes of LSUCC  
265 isolates against the NCBI nt database online with BLASTn (79) and selecting a variable number  
266 of best hits. The *Bacteroidetes* and *Actinobacteria* trees were composed entirely of non-  
267 redundant top 100-300 MegaBLAST hits to a local version of the NCBI nt database, accessed  
268 August 2018. Sequences were aligned with MUSCLE v3.6 (80) using default settings, culled  
269 with TrimAl v1.4.rev22 (81) using the -automated1 flag, and the final alignment was inferred  
270 with IQ-TREE v1.6.11 (82) with default settings and -bb 1000 for ultrafast bootstrapping (83).  
271 Tips were edited with the *nw\_rename* script within Newick Utilities v1.6 (84) and trees were  
272 visualized with Archaeopteryx (85). Fasta files for these trees and the naming keys are available  
273 as Supplemental Information at <https://doi.org/10.6084/m9.figshare.12142098>.

274

### 275 *Assessment of isolate novelty*

276 We quantified taxonomic novelty using BLASTn of our isolate 16S rRNA genes to those of  
277 other known isolates collected in three databases: 1) The NCBI nt database (accessed August  
278 2018) - “NCBIdb”; 2) a custom database comprised of sequences from DTE experiments in other  
279 labs - “DTEdb”; and 3) a database containing all of our isolate 16S rRNA genes - “LSUCCdb”.  
280 The DTEdb and LSUCCdb fasta files are available as Supplemental Information at  
281 <https://doi.org/10.6084/m9.figshare.12142098>. We compared our isolate sequences to these  
282 databases as follows:

- 283 1) All representative sequences were searched against the nt database using BLASTn  
284 (BLAST+v. 2.7.1) with the flags -perc\_identity 84, -evalue 1E-6, -task blastn, -outfmt “6  
285 qseqid sseqid pident length slen qlen mismatch evalue bitscore sscinames sbblastnames  
286 stitle”, and -negative\_gilist to remove uncultured and environmental sequences. The  
287 negative GI list was obtained by searching “environmental samples”[organism] OR  
288 metagenomes[orgn]” in the NCBI Nucleotide database (accessed September 12<sup>th</sup>, 2018)  
289 and hits were downloaded in GI list format. This negative GI list is available as  
290 Supplemental Information at <https://doi.org/10.6084/m9.figshare.12142098>. The resultant  
291 hits from the NCBIdb search were further manually curated to remove sequences  
292 classified as single cell genomes, clones, duplicates, and previously deposited LSUCC  
293 isolates.
- 294 2) We observed that many known HTCC, IMCC, and HIMB isolates that had previously  
295 been described as matching our clades (Figs. S1-5) were missing from the resultant lists  
296 of nt hits, so we extracted isolate accession numbers from numerous DTE experiments  
297 (26–28, 31, 34, 37, 44, 86, 87) from the nt database via *blastdbcmd* and generated a  
298 separate DTEdb using *makeblastdb*. Duplicate accession numbers found in the NCBIdb  
299 were removed. The same BLASTn settings as in 1) were used to search our isolate  
300 sequences against DTEdb. Any match that fell below the lowest percent identity hit to the  
301 NCBIdb was removed from the DTEdb search since the match would not have been  
302 present in the first NCBIdb search.
- 303 3) Finally, using the same BLASTn settings, we compared all pairwise identities of our 328  
304 LSUCC isolate 16S rRNA gene sequences via the LSUCCdb.

305 The output from these searches is available in Table S1 under the “taxonomic novelty” tab.

306 We placed our LSUCC isolates into 55 taxonomic groups based on sharing  $\geq 94\%$   
307 identity and/or their occurrence in monophyletic groups within our 16S rRNA gene trees (Figs.  
308 S1-5, see above). For visualization purposes, in groups with multiple isolates we used our  
309 chronologically first cultivated isolate as the representative sequence for blastn searches, and  
310 these are the top point (100% identity to itself) in each group column of Figure 1. Sequences  
311 from the other DTE culture collections were labeled with the corresponding collection name,  
312 while all other hits were labeled as “Other”.

313 Geographic novelty was assessed by manually screening the accession numbers from hits  
314 to LSUCC isolates with  $\geq 99\%$  16S rRNA gene sequence identity for the latitude and longitude  
315 from a connected publication or location name (e.g. source, country, site) in the NCBI  
316 description. LSUCC isolates in the *Janibacter* sp., *Micrococcus* sp., *Altererythrobacter* sp.,  
317 *Pseudomonas* sp., and *Phycococcus* sp. groups (16 total isolates) were not assessed because of  
318 missing isolation source information and no traceable publication. Isolation locations were  
319 plotted for a subset of important taxa (Table S1 “Map\_cultivars” tab) using the  
320 “LSUCC\_cultivar\_map.R” available at our GitHub repository [https://github.com/thrash-](https://github.com/thrash-lab/Cultivar-novelty-map)  
321 [lab/Cultivar-novelty-map](https://github.com/thrash-lab/Cultivar-novelty-map).

322

### 323 *Modeling DTE cultivation via Monte Carlo simulations*

324 We developed a model using Monte Carlo simulation to estimate the median number of positive  
325 and pure wells (and associated 95% confidence intervals (CI)) expected from a DTE experiment  
326 for a given taxon at different inoculum sizes ( $\lambda$ ), relative abundances ( $r$ ), and viability ( $V$ ) (Fig.  
327 5). For each bootstrap, the number of cells added to each well was simulated using a Poisson  
328 distribution at a mean inoculum size of  $\lambda$  cells per well across  $n$  wells. The number of cells added  
329 to each well that belonged to a specific taxon was then estimated using a binomial distribution  
330 where the number of trials was set as the number of cells in a well and the probability of a cell  
331 belonging to a specific taxon,  $r$ , was the relative abundance of its representative ASV in the  
332 community analysis. Wells that contained at least one cell of a specific taxon were designated  
333 ‘positive’. Wells in which all the cells belonged to a specific taxon were designated as ‘pure’.  
334 Finally, the influence of taxon-specific viability on recovery of ‘pure’ wells was simulated using  
335 a second binomial distribution, where the number of cells within a ‘pure’ well was used as the  
336 number of trials and the probability of growth was a viability score ranging from 0 to 1. For each  
337 simulation, 9,999 bootstraps were performed. Code for the model and all simulations is available  
338 in the ‘viability\_test.py’ at our GitHub repository [https://github.com/thrash-lab/viability\\_test](https://github.com/thrash-lab/viability_test).

339

### 340 *Actual versus expected number of isolates*

341 For each taxon in each DTE experiment, the Monte Carlo simulation was used to evaluate  
342 whether the number of recovered pure wells for each taxon was within 95% CI of simulated  
343 estimates, assuming optimum growth conditions (i.e.  $V = 100\%$ ). For each of 9,999 bootstraps,  
344 460 wells were simulated with the inoculum size used for the experiment and the relative  
345 abundance of the ASV. For taxa where the number of expected wells fell outside the 95% CI of  
346 the model, a deviance score was calculated as the difference between the actual number of wells  
347 observed and median of the simulated dataset. The results of this output are presented in Table  
348 S1 under the “Expected vs actual” tab, and the R script for visualizing this output as Figure 7 is  
349 available at our GitHub repository <https://github.com/thrash-lab/EvsA-visualization>.

350

### 351 *Estimating viability in under-represented taxa*

352 For taxa where the observed number of positive wells was lower than the 95% CI lower limit  
353 within a given experiment, and because our analysis was restricted to only those organisms for  
354 which our media was sufficient for growth at least once, the deviance was assumed to be a  
355 function of a viability term,  $V$ , (ranging from 0 to 1) associated with suboptimal growth  
356 conditions, dormancy, persister cells, etc. To estimate a value of viability for a given taxon  
357 within a particular experiment, the Monte Carlo simulation was run using an experiment-  
358 appropriate inoculum size, relative abundance, and number of wells (460 for each experiment).  
359 Taxon-specific viability was tested across a range of decreasing values from 99% to 1% until  
360 such time as the observed number of pure wells for a given taxon fell between the 95% CI  
361 bounds of the simulated data. At this point, the viability value is the maximum viability of the  
362 taxon that enables the observed number of pure wells for a given taxon to be explained by the  
363 model. The results of this output are presented in Table S1 under the “Expected vs actual” tab.

364

### 365 *Likelihood of recovering taxa at different relative abundances*

366 To estimate the number of wells required in a DTE experiment to have a significant chance of  
367 recovering a taxon with a relative abundance of  $r$ , assuming optimum growth conditions ( $V =$



368 100%), the Monte Carlo model was used to simulate experiments from 92 wells to 9,200 wells  
 369 per experiment across a range of relative abundances from 0 to 100% in 0.1% increments, and a  
 370 range of inoculum sizes (cells per well of 1, 1.27, 1.96, 2, 3, 4 and 5). Each experiment was  
 371 bootstrapped 999 times and the number of bootstraps in which the lower-bound of the 95% CI  
 372 was  $\geq 1$  was recorded.

373

### 374 *Data accessibility*

375 All iTag sequences are available at the Short Read Archive with accession numbers  
 376 SRR6235382-SRR6235415 (29). PCR-generated 16S rRNA gene sequences from this study are  
 377 accessible on NCBI GenBank under the accession numbers MK603525-MK603769. Previously  
 378 generated 16S rRNA genes sequences are accessible on NCBI GenBank under the accession  
 379 numbers KU382357-KU38243 (35). Table S1 is available at  
 380 <https://doi.org/10.6084/m9.figshare.12142113>.

381

## 382 **Results**

### 383 *General cultivation campaign results*

384 We conducted a total of seventeen DTE cultivation experiments to isolate bacterioplankton (sub  
 385 2.7  $\mu\text{m}$  fraction), with paired microbial community characterization of source waters (0.22  $\mu\text{m}$  -  
 386 2.7  $\mu\text{m}$  fraction), from six coastal Louisiana sites over a three-year period (Table S1). We  
 387 inoculated 7,820 distinct cultivation wells (all experiments) with an estimated 1-3 cells $\cdot\text{well}^{-1}$   
 388 using overlapping suites of artificial seawater media, JW (years 1 and 2, (35)) and MWH (year  
 389 3), designed to match the natural environment (Table 1). The MWH suite of media was modified  
 390 from the JW media to additionally include choline, glycerol, glycine betaine, cyanate, DMSO,  
 391 DMSP, thiosulfate, and orthophosphate (Table S1). These compounds have been identified as  
 392 important metabolites and osmolytes for marine and freshwater microorganisms and were absent  
 393 in the first iteration (JW) of our media (88–94). A total of 1,463 wells were positive ( $> 10^4$   
 394 cells $\cdot\text{mL}^{-1}$ ), and 738 of these were transferred to 125 mL polycarbonate flasks. For four  
 395 experiments (FWC, FWC2, JLB2, and JLB3) we only transferred a subset of positives (48/301,  
 396 60/403, 60/103, and 60/146) because the number of isolates exceeded our ability to maintain and  
 397 identify them at that time (Table 1). The subset of positive wells for these four experiments was  
 398 selected using flow cytometry signatures usually indicative of smaller oligotrophic cells like  
 399 SAR11 strain HTCC1062 (49) using our settings. Of the 738 wells from which we transferred  
 400 cells across all experiments, 328 of these yielded repeatably transferable isolates that we deemed  
 401 as pure cultures based on 16S rRNA gene PCR and Sanger sequencing.

402

403 **Table 1. Cultivation statistics, including whole community viability estimates**

| Site             | Date      | $n$ | $z$ | $p$   | $\lambda$ | $V^*$ (ASE) | CV    | our model:<br>estimated #<br>wells with 1<br>cell<br>(bootstrapped<br>median: (xx-xx)<br>95% CI) if<br>$V=1$ ** | our<br>model:<br>$V_{est}$ : min-<br>max 95%<br>CI *** | <i>in situ</i><br>salinity | Medium<br>salinity | Medium      | Study |
|------------------|-----------|-----|-----|-------|-----------|-------------|-------|-----------------------------------------------------------------------------------------------------------------|--------------------------------------------------------|----------------------------|--------------------|-------------|-------|
| CJ               | Sep 2014  | 460 | 15  | 0.033 | 1.27      | 2.6 (0.67)  | 0.259 | 164 (144-185)                                                                                                   | 1.5-4.2                                                | 24.6                       | 34.8               | JWAMPF<br>e | (35)  |
| ARD              | Nov 2014  | 460 | 1   | 0.002 | 1.5       | 0.1 (0.15)  | 1.451 | 154 (134-174)                                                                                                   | 0.1-0.7                                                | 1.72                       | 34.8               | JW1         | (35)  |
| JLB              | Jan 2015  | 460 | 61  | 0.133 | 1.96      | 7.3 (0.93)  | 0.127 | 127 (109-146)                                                                                                   | 5.6-9.2                                                | 26.0                       | 34.8               | JW1         | (35)  |
| FWC <sup>f</sup> | Mar 2015  | 460 | 301 | 0.654 | 2         | 53.1 (3.2)  | 0.06  | 125 (106-143)                                                                                                   | 47.1-59.7                                              | 5.39                       | 5.79               | JW4         | (35)  |
| LKB              | June 2015 | 460 | 15  | 0.033 | 1.8       | 1.8 (0.48)  | 0.266 | 137 (118-156)                                                                                                   | 1.1-3.0                                                | 2.87                       | 5.79               | JW4         | (35)  |
| Tbon2            | Aug 2015  | 460 | 41  | 0.089 | 1.56      | 6.0 (0.93)  | 0.156 | 151 (132-171)                                                                                                   | 4.3-8.1                                                | 14.2                       | 11.6               | JW3         | (35)  |

|                    |          |     |     |       |   |             |       |               |           |      |      |      |            |
|--------------------|----------|-----|-----|-------|---|-------------|-------|---------------|-----------|------|------|------|------------|
| CJ2                | Oct 2015 | 460 | 61  | 0.133 | 2 | 7.1 (0.91)  | 0.128 | 125 (106-143) | 5.6-9.1   | 22.2 | 23.2 | JW2  | (35)       |
| FWC2 <sup>†</sup>  | Apr 2016 | 460 | 403 | 0.876 | 2 | 104.4 (6.2) | 0.059 | 125 (106-143) | >92.3     | 20.9 | 23.2 | JW2  | This study |
| ARD2c              | Jun 2016 | 460 | 7   | 0.015 | 2 | 0.8 (0.29)  | 0.362 | 125 (106-143) | 0.3-1.5   | 0.18 | 1.45 | JW5  | This study |
| JLB2c <sup>†</sup> | May 2016 | 460 | 103 | 0.224 | 2 | 12.7 (1.25) | 0.099 | 125 (106-143) | 10.3-15.4 | 6.89 | 5.79 | JW4  | This study |
| LKB2               | Jul 2016 | 460 | 39  | 0.085 | 2 | 4.4 (0.71)  | 0.161 | 125 (106-143) | 3.2-6.0   | 2.39 | 1.45 | JW5  | This study |
| Tbon3              | Jul 2016 | 460 | 78  | 0.17  | 2 | 9.3 (1.05)  | 0.113 | 125 (106-143) | 7.4-11.5  | 17.7 | 34.8 | MWH1 | This study |
| CJ3                | Sep 2016 | 460 | 69  | 0.15  | 2 | 8.1 (0.98)  | 0.121 | 125 (106-143) | 6.4-10.2  | 23.7 | 23.2 | MWH2 | This study |
| FWC3               | Nov 2016 | 460 | 27  | 0.059 | 2 | 3.0 (0.58)  | 0.194 | 125 (106-143) | 2.0-4.4   | 18.0 | 23.2 | MWH2 | This study |
| ARD3               | Dec 2016 | 460 | 58  | 0.126 | 2 | 6.7 (0.89)  | 0.132 | 125 (106-143) | 5.2-8.6   | 3.72 | 1.45 | MWH5 | This study |
| JLB3 <sup>†</sup>  | Jan 2017 | 460 | 146 | 0.317 | 2 | 19.1 (1.59) | 0.083 | 125 (106-143) | 16.1-22.4 | 12.4 | 11.6 | MWH3 | This study |
| LKB3               | Feb 2017 | 460 | 38  | 0.083 | 2 | 4.3 (0.70)  | 0.163 | 125 (106-143) | 3.1-5.8   | 3.55 | 1.45 | MWH5 | This study |

\*Viability according to equation 1, below. Asymptotic Standard Error (ASE) is presented in parentheses.

\*\*Based on 9,999 bootstraps.

\*\*\*Based on 9,999 bootstraps tested at viability increments of 0.1%.

<sup>†</sup>Experiments where a subset of positive wells were transferred.

FWC2 shows the advantage of our method over equation 1 for extreme values.

### Phylogenetic and geographic novelty of our isolates

The 328 isolates belonged to three Phyla: *Proteobacteria* (n = 319), *Actinobacteria* (n = 8), and *Bacteroidetes* (n = 1) (Figs. S1-S5). We placed these isolates into 55 groups based on their positions within 16S rRNA gene phylogenetic trees (Figs. S1-S5) and as a result of having  $\geq$  94% 16S rRNA gene sequence identity to other isolates. We applied a nomenclature to each group based on previous 16S rRNA gene database designations and/or other cultured representatives (Fig. 1, Table S1). Isolates represented eight putatively novel genera with  $\leq$  94.5% 16S rRNA gene identity to a previously cultured representative: the *Actinobacteria* acIV subclades A and B, and one other unnamed *Actinobacteria* group; an undescribed *Acetobacteraceae* clade (*Alphaproteobacteria*); the freshwater SAR11 LD12 (*Candidatus Fonsibacter ubiquis* (29)); the MWH-UniPo and an unnamed *Burkholderiaceae* clade (*Betaproteobacteria*); and the OM241 *Gammaproteobacteria* (Fig. 1, Table S1). Seven additional putatively novel species in other genera were also isolated (between 94.6 and 96.9% 16S rRNA gene sequence identity) in unnamed *Commamonadaceae* and *Burkholderiales* clades (*Betaproteobacteria*); the SAR92 clade and *Pseudohonigella* genus (*Gammaproteobacteria*); and unnamed *Rhodobacteraceae* and *Bradyrhizobiaceae* clades, as well as *Maricaulis* spp. (*Alphaproteobacteria*) (Fig. 1). LSUCC isolates belonging to the groups BAL58 *Betaproteobacteria* (Fig. S4), OM252 *Gammaproteobacteria*, HIMB59 *Alphaproteobacteria*, and what we designated the LSUCC0101-type *Gammaproteobacteria* (Fig. S5) had close 16S rRNA gene matches to other isolates at the species level, however, none of those previously cultivated organisms have been formally described (Fig. 1). The OM252, BAL58, and MWH-UniPo clades were the most frequently cultivated, with 124 of our 328 isolates belonging to these three groups (Table S1). In total, 73 and 10 of the 328 isolates belonged in putatively novel genera and novel species in previously cultivated genera, respectively. We estimated that at least 310 of these isolates were geographically novel, being the first of their type cultivated from the nGOM (Fig. 2). This included isolates from cosmopolitan groups like SAR11 subclade IIIa, OM43 *Betaproteobacteria*, SAR116, and HIMB11-type “Roseobacter” spp. Cultivars from *Vibrio* sp. and *Alteromonas* sp. were the only two groups with close relatives (species level) isolated from the GOM.

### Natural abundance of isolates

We matched LSUCC isolate 16S rRNA gene sequences with both operational taxonomic units (OTUs) and amplicon single nucleotide variants (ASVs) from bacterioplankton communities to

443 assess the relative abundances of our isolates in the coastal nGOM waters that served as inocula.  
444 While OTUs provide a broad group-level designation (97% sequence identity), this approach can  
445 artificially combine multiple ecologically distinct taxa (95). Due to higher stringency for  
446 defining a matching 16S rRNA gene, ASVs can increase the confidence that our isolates  
447 represent environmentally relevant organisms (74, 96). However, while many abundant  
448 oligotrophic bacterioplankton clades such as SAR11 (29, 97), OM43 (40, 41), SAR116 (98), and  
449 *Sphingomonas* spp. (99) have a single copy of the rRNA gene operon, other taxa can have  
450 multiple rRNA gene copies (97, 100), complicating ASV analyses. Since we could not *a priori*  
451 rule out multiple rRNA gene operons for novel groups with no genome sequenced  
452 representatives, we used both OTU and ASV approaches.

453 In total, we obtained at least one isolate from 40 of the 777 OTUs and 71 of the 1,323  
454 ASVs observed throughout the three-year dataset. 43% and 26% of LSUCC isolates matched the  
455 top 50 most abundant OTUs (median relative abundances, all sites, from 8.1-0.11%; Fig. S6A)  
456 and ASVs (mean relative abundances, all sites, from 3.8-0.11%; Fig. S6B), respectively, across  
457 all sites and samples. Microbial communities from all collected samples clustered into two  
458 groups corresponding to those inhabiting salinities below 7 and above 12, and salinity was the  
459 primary environmental driver distinguishing community beta diversity (OTU:  $R^2=0.88$ ,  $P=0.001$ ,  
460 ASV:  $R^2=0.89$ ,  $P=0.001$ ). As part of the cultivation strategy after the first five experiments, we  
461 used a suite of five media differing by salinity and matched the experiment with the medium that  
462 most closely resembled the salinity at the sample site. Consequently, our isolates matched  
463 abundant environmental groups from both high and low salinity regimes. At salinities above  
464 twelve, LSUCC isolates matched 13 and 14 of the 50 most abundant OTUs and ASVs,  
465 respectively (Figs. 3A, 4A; Table S1). These taxa included the abundant SAR11 subclade IIIa.1,  
466 HIMB59, HIMB11-type “Roseobacter”, and SAR116 *Alphaproteobacteria*; the OM43  
467 *Betaproteobacteria*; and the OM182 and LSUCC0101-type *Gammaproteobacteria*. At salinities  
468 below seven, 10 and 9 of the 50 most abundant OTUs and ASVs, respectively, were represented  
469 by LSUCC isolates, including one of most abundant taxa in both cluster sets, SAR11 LD12  
470 (Figs. 3B, 4B). Some taxa, such as SAR11 IIIa.1 and OM43, were among the top 15 most  
471 abundant taxa in both salinity regimes (Figs. 3, 4, Table S1), suggesting a euryhaline lifestyle. In  
472 fact, our cultured SAR11 IIIa.1 ASV7471 was the most abundant ASV in the aggregate dataset  
473 (Fig. S6).

474 Overall, this effort isolated taxa representing 18 and 12 of the top 50 most abundant  
475 OTUs and ASVs, respectively (Table 2, Fig. S6). When looking at different median relative  
476 abundance categories of  $> 1\%$ ,  $0.1\% - 1\%$ , and  $< 0.1\%$ , isolate OTUs were distributed across  
477 those categories in the following percentages: 15%, 20%, and 27%; isolate ASVs were  
478 distributed accordingly: 4%, 26%, and 37% (Table 2). Isolates with median relative abundances  
479 of  $< 0.1\%$ , such as *Pseudohongiella* spp., *Rhodobacter* spp., and *Bordetella* spp., would  
480 canonically fall within the rare biosphere (101) (Table S1). A number of isolates did not match  
481 any identified OTUs or ASVs (38% and 33% of LSUCC isolates when compared to available  
482 OTUs and ASVs, respectively), either because their matching OTUs/ASVs were below our  
483 thresholds for inclusion (at least two reads from at least two sites), or because they were below  
484 the detection limit from our sequencing effort (Table 2). Thus, 43% and 30% of our isolates  
485 belonged to OTUs and ASVs, respectively, with median relative abundances  $> 0.1\%$ .

486  
487 **Table 2. Median relative abundances ( $r$ ) of cultured OTUs and ASVs across all samples**

|      | In top 50 ranks   | $r > 1\%$         | $1\% - 0.1\% r$   | $r < 0.1\%$       | Not detected       |
|------|-------------------|-------------------|-------------------|-------------------|--------------------|
| OTUs | 18 (140 isolates) | 50 isolates (15%) | 90 isolates (27%) | 65 isolates (20%) | 123 isolates (38%) |

|      |                  |                  |                   |                    |                    |
|------|------------------|------------------|-------------------|--------------------|--------------------|
| ASVs | 12 (84 isolates) | 13 isolates (4%) | 84 isolates (26%) | 122 isolates (37%) | 109 isolates (33%) |
|------|------------------|------------------|-------------------|--------------------|--------------------|

488

### 489 *Modeling DTE cultivation*

490 An enigma that became immediately apparent through a review of our data was the absence of an  
491 obvious relationship between the abundance of a given taxon in the inoculum and the frequency  
492 of obtaining an isolate of the same type from a DTE cultivation experiment (Figs. S7, S8). For  
493 example, although we could culture SAR11 LD12 over a range of media conditions (29), and the  
494 matching ASV had relative abundances of > 5% in six of our seventeen experiments (Fig. 5), we  
495 only isolated one representative (LSUCC0530). In an ideal DTE cultivation experiment where  
496 cells are randomly subsampled from a Poisson-distributed population, if the medium is sufficient  
497 for a given microorganism's growth, then the number of isolates should correlate with that  
498 microorganism's abundance in the inoculum. However, a qualitative examination of several  
499 abundant taxa that grew in our media, some of which we cultured on multiple occasions,  
500 revealed no clear pattern between abundance and isolation success (Fig. 5). Considering that  
501 medium composition was sufficient for cultivation of these organisms on at least some  
502 occasions, we hypothesized that cultivation frequency may reflect differences in the capacity for  
503 growth within populations of a given taxon. Thus, we decided to model cultivation frequency in  
504 relationship to estimated abundances in a way that could generate estimates of cellular viability,  
505 defined herein as meaning "presently able to grow in defined medium," as opposed to a broader  
506 definition equating viability with being alive more generally, since we only evaluated growth  
507 capacity in this study. We hoped that modeling might also help us inform experimental design  
508 and make DTE cultivation efforts more predictable (59).

509 Previously, Don Button and colleagues developed a statistical model for viability ( $V$ ) of  
510 cells in the entire population for a DTE experiment (33):

511

$$512 \quad (1) V = -\frac{\ln(1-p)}{\lambda}$$

513

514 Where  $p$  is the proportion of wells or tubes,  $n$ , with growth,  $z$ , ( $p = z/n$ ) and  $\lambda$  is the estimated  
515 number of cells inoculated per well (the authors used  $X$  originally). The equation uses a Poisson  
516 distribution to account for the variability in cell distribution within the inoculum and therefore  
517 the variability in the number of wells or tubes receiving the expected number of cells. We and  
518 others have used this equation in the past (26, 28, 35) to evaluate the efficacy of our cultivation  
519 experiments in the context of commonly cited numbers for cultivability using agar-plate based  
520 methods (13, 17, 102).

521 While Equation 1 was effective for its intended purpose, it has a number of drawbacks  
522 that limit its utility for taxon-specific application: 1) If  $p=1$ , i.e. all wells are positive, then the  
523 equation is invalid; 2) At high values of  $p$  and low values of  $\lambda$ , estimates of  $V$  can exceed 100%  
524 (Table 1); 3) Accuracy of viability, calculated by the asymptotic standard error,  $ASE$ , or the  
525 coefficient of variation,  $CVV$ , was shown to be non-uniform across a range of  $\lambda$ , with greatest  
526 accuracy when true viability was ~10% (33). Thus, low viability, low values of  $\lambda$ , and small  
527 values of  $n$  were found to produce unreliable results; 4) If  $p=0$ , i.e. no positive wells are  
528 observed, estimates of viability that could produce 0 positive wells cannot be calculated. In  
529 addition, 5) Button's original model assumes that a well will only produce a pure culture if the  
530 inoculated well contains one cell. By contrast, in low diversity samples, samples dominated by a  
531 single taxon, or experiments evaluating viability from axenic cultures across different media, a



532 limitation that only wells with single cells are axenic will underestimate the expected number of  
533 pure wells.

534 To overcome these limitations, we developed a Monte Carlo simulation model that  
535 facilitates the incorporation of relative abundance data from complementary community profiling  
536 data (e.g. 16S rRNA gene amplicons) to calculate the likelihood of positive wells, pure wells,  
537 and viability at a taxon-specific level, based on the observed number of wells for which we  
538 obtained an isolate of a particular taxon (Fig. 6). By employing a Monte Carlo approach, our  
539 model is robust across all values of  $p$  and  $n$  with uniform prediction accuracy, and we can  
540 estimate the accuracy of our prediction within 95% confidence intervals (CI). Furthermore, the  
541 width of 95% CI boundaries of viability, as well as the expected number of positive and pure  
542 wells, are entirely controllable and dependent only on available computational capacity for  
543 bootstrapping (i.e., these can be improved with more bootstrapping, but at greater computational  
544 cost). When zero positive wells are observed experimentally, our approach enables estimation of  
545 a maximum viability that could explain such an observation by identifying the range of  
546 variability values for which zero resides within the bootstrapped 95% CI. Finally, the ability to  
547 calculate the viability of the entire community, as in Equation 1, is retained simply by estimating  
548 viability using a relative abundance of one.

549 We compared our model to that of Button et al. for evaluating viability from whole  
550 community experimental results, similarly to previous reports (26, 28, 35) (Table 1). Our  
551 viability estimates ( $V_{est}$ ) generally agreed with those using the Button et al. calculation, but we  
552 have now provided 95% CI to depict the maximum and minimum viability that would match the  
553 returned positive well distribution, as well as maximum and minimum values for the number of  
554 wells that ought to have contained a single cell. Maximum  $V_{est}$  ranged from 1.1% to > 92.3%  
555 depending on the experiment, with a median  $V_{est}$  across all our experiments of 8.6% (Table 1). In  
556 one case, the extremely high value (FWC2) was better handled by our model compared to  
557 equation 1, because it did not lead to a viability estimation greater than 100%. FWC and FWC2  
558 represent  $V_{est}$  outliers compared with the entire dataset (maximums of 59.7% and > 92.3%,  
559 respectively; Table 1). We believe these high numbers most likely resulted from underestimating  
560 the number of cells inoculated into each well (because of the use of microscopy, the presence of  
561 clumped cells, or possible pipet error- described in (35)), thus increasing the estimated viability.

### 562 *Isolate-specific viability estimates*

564 Our new model also facilitates taxon-specific viability estimates. Cultivation efficacy was  
565 evaluated for 71 cultured taxa matching ASVs within our detection limits (219 isolates) across  
566 17 sites (1,207 pairwise combinations) by comparing the number of observed pure wells to those  
567 predicted by the Monte Carlo simulation using 9,999 bootstraps, 460 wells per experiment, and  
568 an assumption that all cells were viable (i.e.  $V = 100\%$ ). In total, for 1,158 out of 1,207 pairwise  
569 combinations (95.9%) the observed number of pure wells fell within the 95% CI of data  
570 simulated at matching relative abundance and inoculum size, suggesting that these two  
571 parameters alone could explain the observed cultivation success for most taxa (Table S1). 1,059  
572 out of these 1,158 combinations (91%) recorded zero observed wells, but with a maximum  
573 relative abundance of 2.8% within these combinations, a score of zero fell within predicted 95%  
574 CI of simulations with 460 wells. Sensitivity analysis showed that with 460 wells per  
575 experiment, an observation of zero pure wells falls below the 95% confidence intervals lower-  
576 bound (and is thus significantly depleted to enable viability to be estimated) for taxa with relative  
577 abundances of 2.3%, 2.9% and 4.5% for inoculum sizes of one, two and three cells per well,



578 respectively (Fig. S9). In fact, modeling DTE experiments from 92 wells to 9,200 wells per  
 579 experiment showed that for taxa comprising ~1% of a microbial community 1,104 wells (or 12  
 580 plates at 92 wells per plate), 1,380 wells (15 plates) and 2,576 wells (28 plates) were required to  
 581 be statistically likely to recover at least one positive, pure well using inocula of one, two or three  
 582 cells per well, respectively, with  $V = 100\%$  (Fig. S9).

583 A small, but taxonomically relevant minority (49 out of 1,207) of pairwise combinations  
 584 had a number of observed pure wells that fell outside of the simulated 95% CI with  $V = 100\%$   
 585 (Fig. 7). Of these, 28 had either one, two, or three more observed pure wells than the upper 95%  
 586 CI (Table S1), suggesting cultivability *higher* than expected based purely a model capturing the  
 587 interaction between a Poisson-distributed inoculum and a binomially-distributed relative  
 588 abundance, with  $V = 100\%$ . However, the deviance from the expected number of positive wells  
 589 for those above the 95% CI was limited to three or fewer wells, meaning that we only obtained  
 590 1-3 more isolates than expected (Table S1). On the other hand, those organisms that we isolated  
 591 less frequently than expected showed greater deviance. 21 out of the 49 outliers had lower than  
 592 expected cultivability (Fig. 7). These taxa had relative abundances ranging from 2.7% to 14.5%,  
 593 but recorded only 0, 1, or 2 isolates. In the most extreme case, ASV7629 (SAR11 LD12) at Site  
 594 ARD2c comprised 14.5% of the community but recorded no observed pure wells, compared to  
 595 expected number of 13-30 isolates (95% CI) predicted by the Monte Carlo simulation. All the  
 596 examples of taxa that were isolated less frequently than expected given the assumption of  $V =$   
 597  $100\%$  belonged to either SAR11 LD12, SAR11 IIIa.1, or one particular OM43 ASV (7241) (Fig.  
 598 6).

599 We used our model to calculate estimated viability ( $V_{est}$ ) for these organisms based on  
 600 their cultivation frequency at sites where the assumption of  $V = 100\%$  appeared violated (Table  
 601 3). Using the extreme example of SAR11 LD12 ASV7629 at Site ARD2c, simulations across a  
 602 range of  $V$  indicated that a result of zero positive wells fell within 95% of simulated values when  
 603 the associated taxon  $V_{est} \leq 15\%$ . When considering all anomalous cultivation results, LD12 had  
 604 estimated maximum viabilities that ranged up to 55% (Table 3). OM43 (ASV7241) estimated  
 605 maximum viabilities ranged from 52-80%, depending on the site, and similarly, SAR11 IIIa.1  
 606 ranged between 22-82% maximum viability (Table 3).

607  
 608

**Table 3. Estimated viabilities for taxa cultivated less frequently than expected**

| ASV  | Group        | Site               | $r^*$ | $n$ | $z$ | $\lambda$ | Estimated # wells with 1 cell (bootstrapped median: (xx-xx) 95% CI) if $V=1$ ** | $V_{est}$ : min-max 95% CI based on cultivation results*** |
|------|--------------|--------------------|-------|-----|-----|-----------|---------------------------------------------------------------------------------|------------------------------------------------------------|
| 7241 | OM43         | ARD3               | 0.03  | 460 | 0   | 2         | 4 (1-9)                                                                         | 0.1-80                                                     |
| 7241 | OM43         | FWC <sup>†</sup>   | 0.04  | 460 | 0   | 2         | 5 (1-9)                                                                         | 0.1-77                                                     |
| 7241 | OM43         | JLB                | 0.05  | 460 | 0   | 1.96      | 7 (2-12)                                                                        | 0.1-52                                                     |
| 7471 | SAR11 IIIa.1 | ARD3               | 0.11  | 460 | 0   | 2         | 15 (8-23)                                                                       | 0.1-22                                                     |
| 7471 | SAR11 IIIa.1 | CJ                 | 0.03  | 460 | 0   | 1.27      | 4 (1-9)                                                                         | 0.1-82                                                     |
| 7471 | SAR11 IIIa.1 | FWC3               | 0.07  | 460 | 2   | 2         | 9 (4-15)                                                                        | 2.5-80                                                     |
| 7471 | SAR11 IIIa.1 | JLB                | 0.05  | 460 | 0   | 1.96      | 6 (2-11)                                                                        | 0.1-59                                                     |
| 7471 | SAR11 IIIa.1 | JLB2c <sup>†</sup> | 0.08  | 460 | 0   | 2         | 11 (5-18)                                                                       | 0.1-31                                                     |
| 7471 | SAR11 IIIa.1 | JLB3 <sup>†</sup>  | 0.04  | 460 | 0   | 2         | 5 (1-9)                                                                         | 0.1-74                                                     |
| 7471 | SAR11 IIIa.1 | LKB                | 0.05  | 460 | 0   | 1.8       | 6 (2-12)                                                                        | 0.1-55                                                     |
| 7471 | SAR11 IIIa.1 | LKB2               | 0.04  | 460 | 0   | 2         | 5 (1-9)                                                                         | 0.1-77                                                     |
| 7471 | SAR11 IIIa.1 | LKB3               | 0.09  | 460 | 0   | 2         | 11 (6-19)                                                                       | 0.1-30                                                     |
| 7471 | SAR11 IIIa.1 | TBON2              | 0.04  | 460 | 0   | 1.56      | 6 (2-12)                                                                        | 0.1-56                                                     |
| 7471 | SAR11 IIIa.1 | TBON3              | 0.04  | 460 | 0   | 2         | 5 (1-10)                                                                        | 0.1-73                                                     |
| 7629 | SAR11 LD12   | ARD                | 0.11  | 460 | 0   | 1.5       | 18 (10-27)                                                                      | 0.1-20                                                     |
| 7629 | SAR11 LD12   | ARD2c              | 0.15  | 460 | 0   | 2         | 21 (13-30)                                                                      | 0.1-15                                                     |
| 7629 | SAR11 LD12   | ARD3               | 0.05  | 460 | 0   | 2         | 7 (2-12)                                                                        | 0.1-53                                                     |
| 7629 | SAR11 LD12   | FWC <sup>†</sup>   | 0.09  | 460 | 0   | 2         | 12 (6-19)                                                                       | 0.1-28                                                     |

|      |            |      |      |     |   |     |           |        |
|------|------------|------|------|-----|---|-----|-----------|--------|
| 7629 | SAR11 LD12 | LKB  | 0.05 | 460 | 0 | 1.8 | 7 (2-13)  | 0.1-51 |
| 7629 | SAR11 LD12 | LKB2 | 0.08 | 460 | 1 | 2   | 11 (5-18) | 0.3-49 |
| 7629 | SAR11 LD12 | LKB3 | 0.06 | 460 | 0 | 2   | 7 (3-13)  | 0.1-48 |

609 \*Fractional relative abundance

610 \*\*Based on 9,999 bootstraps.

611 \*\*\*Based on 9,999 bootstraps tested at viability increments of 0.1%.

612 †Experiments where a subset of positive wells were transferred.

613

## 614 Discussion

615 This work paired 17 DTE cultivation experiments with cultivation-independent assessments of  
616 microbial community structure in source waters to evaluate cultivation efficacy. We generated  
617 328 new bacterial isolates representing 40 of the 777 OTUs and 71 of the 1,323 ASVs observed  
618 across all samples from which we inoculated DTE experiments. Stated another way, we  
619 successfully cultivated 5% of the total three year bacterioplankton community observed via  
620 either OTU or ASV analyses. A large fraction of our isolates (43% of cultured OTUs, 30% of  
621 cultured ASVs) represented taxa present at median relative abundances > 0.1%, with 15% and  
622 4% of cultured OTUs and ASVs, respectively, at median abundances > 1%. 140 of our isolates  
623 matched the top 50 most abundant OTUs, and 84 isolates matched the top 50 most abundant  
624 ASVs.

625 This campaign led to the first isolations of the abundant SAR11 LD12 and *Actinobacteria*  
626 acIV; the second isolate of the HIMB59 *Alphaproteobacteria*; and new genera within the  
627 *Acetobacteraceae*, *Burkholderiaceae*, OM241 and LSUCC0101-type *Gammaproteobacteria*, and  
628 MWH-UniPo *Betaproteobacteria*; thereby demonstrating again that continued DTE  
629 experimentation leads to isolation of previously uncultured organisms with value for aquatic  
630 microbiology. We have also added a considerable collection of isolates to previously cultured  
631 groups like OM252 *Gammaproteobacteria*, BAL58 *Betaproteobacteria*, and HIMB11-type  
632 “Roseobacter” spp., and the majority of our isolates represent the first versions of these types of  
633 taxa from the Gulf of Mexico, adding comparative biogeographic value to these cultures.

634 Our viability model improved upon the statistical equation developed by Button and  
635 colleagues (33) to extend viability estimates to individual taxa within a mixed community and  
636 provide 95% CI constraining those viability estimates. We cultured several groups of organisms  
637 abundant enough to evaluate viability with 460 wells (Figs. 7, S9). The fact that these organisms  
638 were successfully cultured at least once meant that we could reasonably assume that the medium  
639 was sufficient for growth. Some taxa were cultivated more frequently than expected (Fig. 7). We  
640 explore two possible explanations for this phenomenon- errors in quantification and variation in  
641 microbial cell organization. Any systematic error that led to underestimating the abundance of an  
642 organism would have correspondingly resulted in our underestimating the number of wells in  
643 which we would expect to find a pure culture of that organism. Such underestimations could  
644 come from primer biases associated with amplicon sequencing (69, 70, 103), but we do not know  
645 if those protocols specifically underestimate the OM252, MWH-UniPo, and HIMB11-type taxa  
646 cultured more frequently than expected (Fig. 7). However, due the low number of expected  
647 isolates in these groups, and the small deviances in actual isolates from those expected numbers  
648 (within 1-3 isolates compared to expected values), the biases inherent in the relative abundance  
649 estimations for these taxa were probably small. Furthermore, one of the microorganisms isolated  
650 more frequently than expected matched the OM43 ASV1389 (Fig. S6), whereas another OM43  
651 ASV (7241) was cultivated less frequently than expected (see below), meaning that if primer  
652 bias were the cause of this discrepancy, it would have to be operating differently on very closely  
653 related organisms.

654 One possible biological explanation for why some isolates might have been cultured  
655 more frequently than expected is clumped cells. If cells of any given taxon in nature grew in  
656 small clusters, then the number of cells we added to a well would have been greater than  
657 expected based on a Poisson distribution. Furthermore, the model assumes that each cell is  
658 independent, and that the composition of a subset of cells is only a function of the relative  
659 abundance of the taxon in the community. Within a cluster of cells, this assumption is violated as  
660 the probability of cells being from the same taxon is higher. Thus, the model will underestimate  
661 the probability of a well being pure and therefore underestimate the number of pure wells likely  
662 to be observed within an experiment, leading to a greater number of isolates than expected.  
663 Future microscopy work could examine whether microorganisms such as OM252 and MWH-  
664 UniPo form small clusters *in situ* and/or in pure culture, and whether this phenomenon may be  
665 different for different ASVs of OM43, or if clumping may be a transient phenotype.

666 We also identified three taxa- SAR11 LD12, SAR11 subclade IIIa.1, and the  
667 aforementioned OM43 ASV7241- that were isolated much less frequently than expected based  
668 on their abundances (Fig. 7, Table 3). This could mean that our assumption of  $V = 100\%$  was  
669 incorrect, or that, in contrast to the taxa that were cultured more frequently than expected  
670 (above), our methods had biases that *overestimated* the abundance of these organisms, thereby  
671 over-inflating the expected number of isolates. We used the modified 515/806RB primers that  
672 have been shown to be much more accurate in quantifying SAR11 compared to FISH than the  
673 original 515/806 primers (within  $6\% \pm 4\%$  SD), and this protocol almost always underestimates  
674 SAR11 abundance (69). This suggests that our expected number of isolates may have actually  
675 been underestimated, our cultivation success poorer than we measured, and therefore we may be  
676 overestimating viability for the SAR11 taxa in this study. Other sources of systematic error that  
677 might impinge on successful transfers, and thereby reduce our recovery, include sensitivity to  
678 pipette tip and/or flask material. However, the fact that these taxa were sometimes successfully  
679 isolated means that if these mechanisms were impacting successful transfers, then their activity  
680 was less than 100% efficient, which implies variations in subpopulation vulnerability that would  
681 be very similar conceptually to variations in subpopulation viability.

682 Another possible source of error that could have resulted in lower than expected numbers  
683 of isolates was the subset of experiments for which we did not transfer all positive wells due to  
684 limitations in available personnel time (Tables 1 & 3). However, our selection criteria for the  
685 subset of wells to transfer was based on flow cytometric signatures that would have encompassed  
686 small cells like SAR11 (see Results), and in any case, there were many examples of lower than  
687 expected recovery from other experiments where we transferred all positive wells (Table 3).  
688 Thus, we believe that these four experiments were unlikely to contribute major errors biasing our  
689 estimates of viability for SAR11 LD12, SAR11 IIIa.1, and other small cells like OM43.

690 If we instead explore biological reasons for the lower than expected numbers of positive  
691 wells in DTE experiments, a plausible explanation supported by the literature is simply that a  
692 large fraction of the population is in some state of inactivity or at least not actively dividing  
693 (104). Studies using uptake of a variety of radiolabelled carbon and sulfur sources have  
694 demonstrated substantial fractions of SAR11 cells may be inactive depending on the population  
695 (105–108). SAR11 cells in the northwest Atlantic and Mediterranean showed variable uptake of  
696 labelled leucine (30-50% (105, 106); ~25-55% (108, 109)) and amino acids (34-61% (105, 106);  
697 34-66% (105, 106)). Taken in reverse, this means that up to 75% of the SAR11 population may  
698 be dormant at any given time. In another study focused on brackish communities, less than 10%  
699 of SAR11 LD12 cells took up labelled leucine and/or thymidine (107). While this was likely not

700 the ideal habitat for LD12 based on salinities above six (29, 107), this study supports the others  
701 above that show substantial proportions of inactive SAR11 cells, the fraction of which may  
702 depend on environmental conditions and other unknown factors. Bi-orthogonal non-canonical  
703 amino acid tagging (BONCAT) shows similar trends for SAR11 (110). These results also match  
704 general data indicating prevalent inactivity among aquatic bacterioplankton (104, 111–113).  
705 Although labelled uptake methods do not directly measure rates of cell division, the  
706 incorporation of these compounds requires active DNA replication or translation, which  
707 represent an even more fundamental level of activity than cell division (114).

708 Why might selection favor high percentages of subpopulation dormancy? One possibility  
709 is as an effective defense mechanism against abundant viruses. Viruses infecting SAR11 have  
710 been shown to be extremely abundant in both marine (115, 116) and freshwater (117) systems.  
711 Indeed, the paradox of high viral abundances and high host abundances in SAR11 has led to a  
712 refining of negative density dependent selection through Lotka-Volterra predator-prey dynamics  
713 (118) to include heterogeneous susceptibility at the strain level (119, 120) and positive density  
714 dependent selection through intraspecific proliferation of defense mechanisms (121). Activity of  
715 lytic viruses infecting SAR11 *in situ* demonstrated that phages infecting SAR11 have lower  
716 ratios of viral transcripts to host cells compared to other abundant taxa, and that observed abrupt  
717 changes in these ratios suggest co-existence of several SAR11 strains with different life  
718 strategies and phage susceptibility (122). Phenotypic stochasticity of phage receptor expression  
719 has been shown to maintain a small proportion of phage-insensitive hosts within a population,  
720 enabling coexistence of predator and prey without extinction (123). Phages adsorb to a vast array  
721 of receptor proteins on their hosts, with many well-characterised receptors (e.g. OmpC, TonB,  
722 BtuB, LamB) associated with nutrient uptake or osmoregulation (124). Selection therefore  
723 favours phenotypes that limit receptor expression, with an associated fitness cost, particularly in  
724 nutrient-limited environments.

725 However, an alternative mechanism is possible if a population of cells comprised a small  
726 number of susceptible cells, and a large number of either resistant or dormant cells where  
727 presentation of receptor proteins is retained. The majority of host-virus encounters would occur  
728 with resistant or dormant cells, and constrain viral propagation through inefficient or failed  
729 infection, effectively acting as a sink for infectious particles. Prevalent lysogeny in SAR11  
730 populations would provide a mechanism for establishing resistant cells via superinfection  
731 immunity (125, 126), where integration of a temperate phage prevents infection by other closely  
732 related viruses. There is growing evidence that many viruses infecting SAR11 are temperate  
733 (127, 128) and that reversion to virulence can be triggered through nutrient limitation (128) in  
734 contrast to other systems where lysogeny is favoured in nutrient-poor conditions (129). Viral  
735 infection may also trigger host dormancy, lowering cellular metabolism to minimise energy  
736 requirements under nutrient limited conditions (130). Such cells would be selected against during  
737 cultivation experiments, potentially explaining the rarity of SAR11 isolate genomes found to  
738 contain prophages. Dormancy and/or lysogeny would also enable long-term co-stability between  
739 abundant phages and their hosts (131) and resolve the apparent paradox of high host and virus  
740 abundances (126).

741 Detailed measurements of dormancy in SAR11 and what types of cellular functions  
742 become inactivated are part of our ongoing work. In the meantime, it is prudent to examine the  
743 implications of a substantial proportion of non-dividing cells for our understanding of basic  
744 growth dynamics. Studies attempting to measure SAR11 growth rates in nature have yielded a  
745 wide range of results, ranging from 0.03-1.8 day<sup>-1</sup> (97, 105, 108, 132–134). These span wider



746 growth rates than observed for axenic cultures of SAR11 ( $0.4-1.2 \text{ day}^{-1}$ ), but isolate-specific  
747 growth ranges within that spread are much more constrained (29, 36, 49, 135, 136). Conversion  
748 factors for determining production from  $^3\text{H}$ -leucine incorporation (137) are accurate for at least  
749 some Ia subclade members of SAR11 (138), so variations in growth rate estimates from  
750 microradiography experiments likely have other explanations. It is possible that different strains  
751 of SAR11 simply have variations in growth rate not captured by existing isolates. Another, not  
752 mutually exclusive, possibility is that the differences in *in situ* growth rate estimates also reflect  
753 variations in the proportion of actively dividing cells within the population. A simple model of  
754 cell division with binary fission where only a subset of cells divide and non-dividing cells  
755 persist, rather than die, can still yield logarithmic growth curves (Fig. S10) like those observed  
756 for SAR11 in pure culture (29, 49, 139). However, this subpopulation variability means that the  
757 division rate for the subset of cells that are actively dividing is much higher than calculated when  
758 assuming 100% dividing cells in the population. Based on our estimated viability for SAR11  
759 LD12 of 15-55%, to obtain our previously calculated maximum division rate ( $0.5 \text{ day}^{-1}$ ) for the  
760 whole culture (29), the per-cell division rate for only a subpopulation would span  $2.48-0.79 \text{ day}^{-1}$   
761 (Fig. S10, Supplemental Text). Verifying the proportion of SAR11 cells actively dividing in a  
762 culture may be challenging. Time-lapse microscopy (140) offers an elegant solution if SAR11  
763 can be maintained for the requisite time periods for accurate measurements in a microfluidic  
764 device.

765 In addition to identifying taxa whose isolation success suggested deviations from  
766 biological assumptions of single planktonic cells with 100% viability, the model also revealed  
767 the limitations of DTE cultivation in assessing viability depending on relative abundance (Fig.  
768 S9). We cannot ascertain whether any given taxon may violate an assumption of  $V = 100\%$   
769 unless we have enough wells to demonstrate that it grew in fewer wells than expected. For  
770 example, taxa at 1% of the microbial community require more than 1,000 wells before the lack  
771 of a cultured organism represents a significant negative event, rather than a taxon simply lacking  
772 sufficient abundance to ensure inclusion in a well within 95% CI. In our 460 well experiments,  
773 we could not resolve whether taxa may have had viabilities below 100% if they were less than  
774 3% of the community for any given experiment (Fig. S9). Modeling DTE experiments showed  
775 that for experiments targeting rare taxa, lower inoculum sizes are favoured where selective media  
776 for enrichment is either unknown or undesirable. The exponential increase in the number of  
777 required wells with respect to the inoculum size is a function of a pure well requiring *all* cells  
778 within it to belong to the same taxon, assuming all cells are equally and optimally viable.

779 By providing taxon-specific predictions of viability from cultivation data, our model now  
780 facilitates an iterative process to improve experimental design and make cultivation more  
781 reliable. First, we use the cultivation success rates to determine for which taxa the assumption of  
782 100% viability was violated. Second, we use the model to estimate viability for those organisms.  
783 Third, we use the viability and relative abundance data to determine, within 95% CI, the  
784 appropriate number of inoculation attempts required to isolate a new version of that organism.  
785 Using SAR11 LD12 as an example, given a relative abundance of 10%, and a viability of 15%,  
786 800 DTE wells should yield four pure, positive wells (1-8 95% CI). This means that, for  
787 microorganisms that we know successfully grow in our media, we can now statistically constrain  
788 the appropriate number of wells required to culture a given taxon again. For organisms that were  
789 not abundant enough to estimate viability using the model, we can use a conservative viability  
790 assumption (e.g., 50% (111)) with which to base our cultivation strategy, thereby still reducing  
791 uncertainty about the experimental effort necessary to re-isolate one of these microorganisms.



792  
793  
794  
795  
796  
797  
798  
799  
800  
801  
802  
803  
804  
805  
806  
807  
808  
809  
810  
811  
812  
813  
814  
815  
816  
817  
818  
819  
820  
821  
822  
823  
824  
825  
826  
827  
828  
829  
830  
831  
832  
833  
834  
835  
836  
837

### *Conclusions*

This work has provided hundreds of new cultures for microbiological research, many among the most abundant members of the nGOM coastal bacterioplankton community. It also provides another demonstration of the effectiveness of sustained cultivation efforts for bringing previously uncultivated strains into culture. Our modeled cultivation results have generated compelling evidence for low viability within subpopulations of SAR11 LD12 and IIIa.1, as well as OM43 *Betaproteobacteria*. The prevalence of, and controls on, dormancy in these clades deserves further study. We anticipate that future work with larger DTE experiments will yield similar viability data about other groups of taxa with lower abundance, highlighting a valuable diagnostic application of DTE cultivation/modeling beyond the primary role in isolating new microorganisms. The integration of cultivation results, natural abundance data from inoculum communities, and DTE modeling represents an important step forward in quantifying the risk associated with DTE efforts to isolate valuable taxa from new sources, or repeating isolation from the same locations. We hope variations of this approach will be incorporated into wider community efforts to invest in culturing the uncultured.

### **Acknowledgments**

We would like to thank Dr. Nancy Rabalais for her comments and edits on a very early draft of this manuscript. Portions of this research were conducted with high-performance computing resources provided by Louisiana State University (<http://www.hpc.lsu.edu>) and the University of Southern California (<http://hpc.usc.edu>).

### **Funding Information**

This work was supported by the Department of Biological Sciences at Louisiana State University, a Louisiana Board of Regents grant to JCT (LEQSF(2014-17)-RD-A-06), a National Academies of Science, Engineering, and Medicine Gulf Research Program Early Career Fellowship to JCT, and the Dornsife College of Letters, Arts and Sciences at the University of Southern California. BT was partially funded by NERC award NE/R010935/1 and by the Simons Foundation BIOS-SCOPE program. The funders had no role in study design, data collection, and interpretation, or the decision to submit the work for publication.

### **Author Contributions**

MWH led sample collections, cultivation experiments, nucleic acid extraction, amplicon sequencing, and analyses; VCL, DMP, JLW, and AML supported sample collections, cultivation experiments, and nucleic acid extractions; MWH and JCT conducted cultivation comparisons and phylogenetic analyses; BT developed the viability model and led the statistical analyses; CC derived the cell-specific growth rate equations incorporating viability; JCT designed the study and assisted with sample collections and model refinement; MWH, BT, and JCT led manuscript writing; and all authors contributed to and reviewed the text.

## 838 **Figures**

839

840 **Figure 1.** Percent identity of LSUCC isolate 16S rRNA genes compared with those from other  
841 isolates in NCBI (“Other”, gray dots) or from the DTE culture collections IMCC (gold dots),  
842 HTCC (blue dots), and HIMB (green dots). Each dot represents a pairwise 16S rRNA gene  
843 comparison (via BLASTn). X-axis categories are groups designated according to  $\geq 94\%$   
844 sequence identity and phylogenetic placement (see Figs S1-S4). Above the graph is the 16S  
845 rRNA gene sequence percent identity to the closest non-LSUCC isolate within a column. Groups  
846 colored in red indicate those where LSUCC isolates represent putatively novel genera, whereas  
847 orange indicates putatively novel species.

848

849 **Figure 2.** A global map of the isolation location of isolates from selected important aquatic  
850 bacterioplankton clades. All depicted taxa were isolated from surface water ( $< 1\text{-}20\text{m}$ ), or the  
851 depth of sample was not reported (see Table S1 for details). Circles represent LSUCC isolates,  
852 while triangles are non-LSUCC isolates. Inset: a zoomed view of the coastal Louisiana region  
853 where LSUCC bacterioplankton originated.

854

855 **Figure 3.** Rank abundances of the 50 most abundant OTUs from all sites based on median  
856 relative abundance at salinities less than seven (A) and greater than twelve (B). The boxes  
857 indicate the interquartile range (IQR) of the data, with vertical lines indicating the upper and  
858 lower extremes according to  $1.5 \times \text{IQR}$ . Horizontal lines within each box indicate the median.  
859 The data points comprising the distribution are plotted on top of the boxplots. The shade of the  
860 dot represents the salinity at the sample site (red-blue :: lower-higher), while the color of the box  
861 indicates broad taxonomic identity. LSUCC labels indicate OTUs with at least one cultivated  
862 representative.

863

864 **Figure 4.** Rank abundances of the 50 most abundant ASVs from all sites based on median  
865 relative abundance at salinities less than seven (A) and greater than twelve (B). The boxes  
866 indicate the interquartile range (IQR) of the data, with vertical lines indicating the upper and  
867 lower extremes according to  $1.5 \times \text{IQR}$ . Horizontal lines within each box indicate the median.  
868 The data points comprising the distribution are plotted on top of the boxplots. The shade of the  
869 dot represents the salinity at the sample site (red-blue :: lower-higher), while the color of the box  
870 indicates broad taxonomic identity. LSUCC labels indicate ASVs with at least one cultivated  
871 representative.

872

873 **Figure 5.** Relative abundance of ASVs within key taxonomic groups compared with salinity.  
874 ASV types are colored independently, and triangle points indicate experiments for which at least  
875 one isolate was obtained. Non-linear regression lines are provided as a visual aid for abundance  
876 trends.

877

878 **Figure 6.** Graphical depiction of the viability model.

879

880 **Figure 7.** Actual vs. expected numbers of isolates. Each point represents the actual number of  
881 isolates for every ASV/experiment pair compared to the expected number of isolates based on  
882 our model assuming 100% viability. Colors represent the relationship to the model predictions:  
883 green- isolates within the 95% CI for expected frequency, orange- actual isolates  $>$  maximum

884 95% CI for expected isolates; blue- actual isolates < minimum 95% CI for expected isolates.  
885 Circle size is proportional to the deviation of the number of actual isolates from the maximum  
886 (for orange) or minimum (for blue) 95% CI for expected isolates. The dotted line is the 1:1 ratio.  
887 Notable taxa on the extremities of the actual and expected values are labeled. All datapoints  
888 provided in Table S1.  
889  
890

891 **References**

- 892 1. Metcalf WW, Griffin BM, Cicchillo RM, Gao J, Janga SC, Cooke HA, Circello BT, Evans  
893 BS, Martens-Habbena W, Stahl DA, van der Donk WA. 2012. Synthesis of  
894 methylphosphonic acid by marine microbes: a source for methane in the aerobic ocean.  
895 *Science* 337:1104–1107.
- 896 2. Carini P, White AE, Campbell EO, Giovannoni SJ. 2014. Methane production by  
897 phosphate-starved SAR11 chemoheterotrophic marine bacteria. *Nat Commun* 5:4346.
- 898 3. Karl DM, Beversdorf L, Björkman KM, Church MJ, Martinez A, Delong EF. 2008. Aerobic  
899 production of methane in the sea. *Nat Geosci* 1:473–478.
- 900 4. Steindler L, Schwalbach MS, Smith DP, Chan F, Giovannoni SJ. 2011. Energy starved  
901 *Candidatus Pelagibacter ubique* substitutes light-mediated ATP production for endogenous  
902 carbon respiration. *PLoS One* 6:e19725.
- 903 5. Gómez-Consarnau L, González JM, Coll-Lladó M, Gourdon P, Pascher T, Neutze R,  
904 Pedrós-Alió C, Pinhassi J. 2007. Light stimulates growth of proteorhodopsin-containing  
905 marine Flavobacteria. *Nature* 445:210–213.
- 906 6. Daims H, Lebedeva EV, Pjevac P, Han P, Herbold C, Albertsen M, Jehmlich N, Palatinszky  
907 M, Vierheilig J, Bulaev A, Kirkegaard RH, von Bergen M, Rattei T, Bendinger B, Nielsen  
908 PH, Wagner M. 2015. Complete nitrification by *Nitrospira* bacteria. *Nature* 528:504–509.
- 909 7. Lam KS. 2006. Discovery of novel metabolites from marine actinomycetes. *Curr Opin*  
910 *Microbiol* 9:245–251.
- 911 8. Jensen PR, Williams PG, Oh D-C, Zeigler L, Fenical W. 2007. Species-specific secondary  
912 metabolite production in marine actinomycetes of the genus *Salinispora*. *Appl Environ*  
913 *Microbiol* 73:1146–1152.
- 914 9. Nett M, Erol Ö, Kehraus S, Köck M, Krick A, Eguereva E, Neu E, König GM. 2006.  
915 Siphonazole, an Unusual Metabolite from *Herpetosiphon* sp. *Angew Chem Int Ed* 45:3863–  
916 3867.
- 917 10. Ling LL, Schneider T, Peoples AJ, Spoering AL, Engels I, Conlon BP, Mueller A,  
918 Schäberle TF, Hughes DE, Epstein S, Jones M, Lazarides L, Steadman VA, Cohen DR,  
919 Felix CR, Fetterman KA, Millett WP, Nitti AG, Zullo AM, Chen C, Lewis K. 2015. A new  
920 antibiotic kills pathogens without detectable resistance. *Nature* 517:455–459.
- 921 11. Lloyd KG, Steen AD, Ladau J, Yin J, Crosby L. 2018. Phylogenetically Novel Uncultured  
922 Microbial Cells Dominate Earth Microbiomes. *mSystems* 3:e00055–18.
- 923 12. Hug LA. 2018. Sizing Up the Uncultured Microbial Majority. *mSystems* 3:e00185–18.
- 924 13. Steen AD, Crits-Christoph A, Carini P, DeAngelis KM, Fierer N, Lloyd KG, Thrash JC.  
925 2019. High proportions of bacteria and archaea across most biomes remain uncultured.

- 926 ISME J 13:3126–3130.
- 927 14. Overmann J, Abt B, Sikorski J. 2017. Present and Future of Culturing Bacteria. *Annu Rev*  
928 *Microbiol* 71:711–730.
- 929 15. Rappé MS. 2013. Stabilizing the foundation of the house that 'omics builds: the evolving  
930 value of cultured isolates to marine microbiology. *Curr Opin Microbiol* 16:618–624.
- 931 16. Carini P. 2019. A “Cultural” Renaissance: Genomics Breathes New Life into an Old Craft.  
932 *mSystems* 4:e00092–19.
- 933 17. Staley JT, Konopka A. 1985. Measurement of in situ activities of nonphotosynthetic  
934 microorganisms in aquatic and terrestrial habitats. *Annu Rev Microbiol* 39:321–346.
- 935 18. Amann RI, Ludwig W, Schleifer KH. 1995. Phylogenetic identification and in situ detection  
936 of individual microbial cells without cultivation. *Microbiol Rev* 59:143–169.
- 937 19. Hahn MW, Koll U, Schmidt J. 2019. Isolation and Cultivation of Bacteria, p. 313–351. *In*  
938 Hurst, CJ (ed.), *The Structure and Function of Aquatic Microbial Communities*. Springer  
939 International Publishing, Cham.
- 940 20. Kaeberlein T, Lewis K, Epstein SS. 2002. Isolating “uncultivable” microorganisms in pure  
941 culture in a simulated natural environment. *Science* 296:1127–1129.
- 942 21. Zengler K, Toledo G, Rappe M, Elkins J, Mathur EJ, Short JM, Keller M. 2002. Cultivating  
943 the uncultured. *Proc Natl Acad Sci U S A* 99:15681–15686.
- 944 22. Steinert G, Whitfield S, Taylor MW, Thoms C, Schupp PJ. 2014. Application of Diffusion  
945 Growth Chambers for the Cultivation of Marine Sponge-Associated Bacteria. *Mar*  
946 *Biotechnol* 16:594–603.
- 947 23. Nichols D, Cahoon N, Trakhtenberg EM, Pham L, Mehta A, Belanger A, Kanigan T, Lewis  
948 K, Epstein SS. 2010. Use of Ichip for High-Throughput In Situ Cultivation of  
949 “Uncultivable” Microbial Species. *Appl Environ Microbiol* 76:2445–2450.
- 950 24. Tandogan N, Abadian PN, Epstein S, Aoi Y, Goluch ED. 2014. Isolation of microorganisms  
951 using sub-micrometer constrictions. *PLoS One* 9:e101429.
- 952 25. Hahn MW, Stadler P, Wu QL, Pöckl M. 2004. The filtration–acclimatization method for  
953 isolation of an important fraction of the not readily cultivable bacteria. *J Microbiol Methods*  
954 57:379–390.
- 955 26. Cannon SA, Giovannoni SJ. 2002. High-throughput methods for culturing microorganisms  
956 in very-low-nutrient media yield diverse new marine isolates. *Appl Environ Microbiol*  
957 68:3878–3885.
- 958 27. Yang SJ, Kang I, Cho JC. 2016. Expansion of Cultured Bacterial Diversity by Large-Scale  
959 Dilution-to-Extinction Culturing from a Single Seawater Sample. *Microb Ecol* 71:29–43.



- 960 28. Stigl U, Tripp HJ, Giovannoni SJ. 2007. Improvements of high-throughput culturing  
961 yielded novel SAR11 strains and other abundant marine bacteria from the Oregon coast and  
962 the Bermuda Atlantic Time Series study site. *ISME J* 1:361–371.
- 963 29. Henson MW, Lanclos VC, Faircloth BC, Thrash JC. 2018. Cultivation and genomics of the  
964 first freshwater SAR11 (LD12) isolate. *ISME J* 12:1846–1860.
- 965 30. Hahnke RL, Bennke CM, Fuchs BM, Mann AJ, Rhiel E, Teeling H, Amann R, Harder J.  
966 2015. Dilution cultivation of marine heterotrophic bacteria abundant after a spring  
967 phytoplankton bloom in the North Sea. *Environ Microbiol* 17:3515–3526.
- 968 31. Sosa OA, Gifford SM, Repeta DJ, DeLong EF. 2015. High molecular weight dissolved  
969 organic matter enrichment selects for methylotrophs in dilution to extinction cultures. *ISME*  
970 *J* 9:2725–2739.
- 971 32. Schut F, de Vries EJ, Gottschal JC, Robertson BR, Harder W, Prins RA, Button DK. 1993.  
972 Isolation of Typical Marine Bacteria by Dilution Culture: Growth, Maintenance, and  
973 Characteristics of Isolates under Laboratory Conditions. *Appl Environ Microbiol* 59:2150–  
974 2160.
- 975 33. Button DK, Schut F, Quang P, Martin R, Robertson BR. 1993. Viability and isolation of  
976 marine bacteria by dilution culture: theory, procedures, and initial results. *Appl Environ*  
977 *Microbiol* 59:881–891.
- 978 34. Song J, Oh HM, Cho JC. 2009. Improved culturability of SAR11 strains in dilution-to-  
979 extinction culturing from the East Sea, West Pacific Ocean. *FEMS Microbiol Lett* 295:141–  
980 147.
- 981 35. Henson MW, Pitre DM, Weckhorst JL, Lanclos VC, Webber AT, Thrash JC. 2016.  
982 Artificial Seawater Media Facilitate Cultivating Members of the Microbial Majority from  
983 the Gulf of Mexico. *mSphere* 1:e00028–16.
- 984 36. Rappé MS, Cannon SA, Vergin KL, Giovannoni SJ. 2002. Cultivation of the ubiquitous  
985 SAR11 marine bacterioplankton clade. *Nature* 418:630–633.
- 986 37. Marshall KT, Morris RM. 2013. Isolation of an aerobic sulfur oxidizer from the  
987 SUP05/Arctic96BD-19 clade. *ISME J* 7:452–455.
- 988 38. Shah V, Chang BX, Morris RM. 2017. Cultivation of a chemoautotroph from the SUP05  
989 clade of marine bacteria that produces nitrite and consumes ammonium. *ISME J* 11:263–  
990 271.
- 991 39. Spietz RL, Lundeen RA, Zhao X, Nicastro D, Ingalls AE, Morris RM. 2019. Heterotrophic  
992 carbon metabolism and energy acquisition in *Candidatus Thioglobus singularis* strain PS1, a  
993 member of the SUP05 clade of marine Gammaproteobacteria. *Environ Microbiol* 21:2391–  
994 2401.
- 995 40. Huggett MJ, Hayakawa DH, Rappé MS. 2012. Genome sequence of strain HIMB624, a

- 996 cultured representative from the OM43 clade of marine Betaproteobacteria. *Stand Genomic*  
997 *Sci* 6:11–20.
- 998 41. Giovannoni SJ, Hayakawa DH, Tripp HJ, Stingl U, Givan SA, Cho J-C, Oh H-M, Kitner  
999 JB, Vergin KL, Rappé MS. 2008. The small genome of an abundant coastal ocean  
1000 methylothroph. *Environ Microbiol* 10:1771–1782.
- 1001 42. Durham BP, Grote J, Whittaker KA, Bender SJ, Luo H, Grim SL, Brown JM, Casey JR,  
1002 Dron A, Florez-Leiva L, Others. 2014. Draft genome sequence of marine  
1003 alphaproteobacterial strain HIMB11, the first cultivated representative of a unique lineage  
1004 within the Roseobacter clade possessing an unusually small genome. *Stand Genomic Sci*  
1005 9:632–645.
- 1006 43. Cho JC, Giovannoni SJ. 2004. Cultivation and Growth Characteristics of a Diverse Group  
1007 of Oligotrophic Marine Gammaproteobacteria. *Appl Environ Microbiol* 70:432–440.
- 1008 44. Kim S, Kang I, Seo J-H, Cho J-C. 2019. Culturing the ubiquitous freshwater actinobacterial  
1009 acI lineage by supplying a biochemical “helper” catalase. *ISME J* 13:2252–2263.
- 1010 45. Tripp HJ. 2013. The unique metabolism of SAR11 aquatic bacteria. *J Microbiol* 51:147–  
1011 153.
- 1012 46. Nichols D, Lewis K, Orjala J, Mo S, Ortenberg R, O’Connor P, Zhao C, Vouros P,  
1013 Kaerberlein T, Epstein SS. 2008. Short Peptide Induces an “Uncultivable” Microorganism  
1014 To Grow In Vitro. *Appl Environ Microbiol* 74:4889–4897.
- 1015 47. Stewart EJ. 2012. Growing unculturable bacteria. *J Bacteriol* 194:4151–4160.
- 1016 48. Kell DB, Young M. 2000. Bacterial dormancy and culturability: the role of autocrine  
1017 growth factors. *Curr Opin Microbiol* 3:238–243.
- 1018 49. Carini P, Steindler L, Beszteri S, Giovannoni SJ. 2013. Nutrient requirements for growth of  
1019 the extreme oligotroph “Candidatus Pelagibacter ubique” HTCC1062 on a defined medium.  
1020 *ISME J* 7:592–602.
- 1021 50. Epstein SS. 2013. The phenomenon of microbial uncultivability. *Curr Opin Microbiol*  
1022 16:636–642.
- 1023 51. Shah D, Zhang Z, Khodursky A, Kaldalu N, Kurg K, Lewis K. 2006. Persisters: a distinct  
1024 physiological state of *E. coli*. *BMC Microbiol* 6:53.
- 1025 52. Kell D, Potgieter M, Pretorius E. 2015. Individuality, phenotypic differentiation, dormancy  
1026 and “persistence” in culturable bacterial systems: commonalities shared by environmental,  
1027 laboratory, and clinical microbiology. *F1000Res* 4:179.
- 1028 53. Lennon JT, Jones SE. 2011. Microbial seed banks: the ecological and evolutionary  
1029 implications of dormancy. *Nat Rev Microbiol* 9:119–130.

- 1030 54. Grassi L, Di Luca M, Maisetta G, Rinaldi AC, Esin S, Trampuz A, Batoni G. 2017.  
1031 Generation of persister cells of *Pseudomonas aeruginosa* and *Staphylococcus aureus* by  
1032 chemical treatment and evaluation of their susceptibility to membrane-targeting agents.  
1033 *Front Microbiol* 8:1917.
- 1034 55. Bergkessel M, Basta DW, Newman DK. 2016. The physiology of growth arrest: uniting  
1035 molecular and environmental microbiology. *Nat Rev Microbiol* 14:549–562.
- 1036 56. Kussell E, Leibler S. 2005. Phenotypic diversity, population growth, and information in  
1037 fluctuating environments. *Science* 309:2075–2078.
- 1038 57. Kurm V, van der Putten WH, Gera Hol WH. 2019. Cultivation-success of rare soil bacteria  
1039 is not influenced by incubation time and growth medium. *PLoS One* 14:e0210073.
- 1040 58. D’Onofrio A, Crawford JM, Stewart EJ, Witt K, Gavrish E, Epstein S, Clardy J, Lewis K.  
1041 2010. Siderophores from neighboring organisms promote the growth of uncultured bacteria.  
1042 *Chem Biol* 17:254–264.
- 1043 59. Thrash JC. 2019. Culturing the Uncultured: Risk versus Reward. *mSystems* 4:e00130–19.
- 1044 60. Thrash JC, Weckhorst JL, Pitre DM. 2017. Cultivating Fastidious Microbes, p. 57–78. *In*  
1045 McGenity, TJ, Timmis, KN, Nogales, B (eds.), *Hydrocarbon and Lipid Microbiology*  
1046 *Protocols*. Springer Berlin Heidelberg, Berlin, Heidelberg.
- 1047 61. Vila-Costa M, Simó R, Harada H, Gasol JM, Slezak D, Kiene RP. 2006.  
1048 Dimethylsulfoniopropionate uptake by marine phytoplankton. *Science* 314:652–654.
- 1049 62. Mou X, Hodson RE, Moran MA. 2007. Bacterioplankton assemblages transforming  
1050 dissolved organic compounds in coastal seawater. *Environ Microbiol* 9:2025–2037.
- 1051 63. Stein LY. 2015. Microbiology: Cyanate fuels the nitrogen cycle. *Nature* 524:43–44.
- 1052 64. Repeta DJ, Ferrón S, Sosa OA, Johnson CG, Repeta LD, Acker M, Delong EF, Karl DM.  
1053 2016. Marine methane paradox explained by bacterial degradation of dissolved organic  
1054 matter. *Nat Geosci* 9:884–887.
- 1055 65. Curson ARJ, Liu J, Bermejo Martínez A, Green RT, Chan Y, Carrión O, Williams BT,  
1056 Zhang S-H, Yang G-P, Bulman Page PC, Zhang X-H, Todd JD. 2017.  
1057 Dimethylsulfoniopropionate biosynthesis in marine bacteria and identification of the key  
1058 gene in this process. *Nat Microbiol* 2:17009.
- 1059 66. Widner B, Mulholland MR. 2017. Cyanate distribution and uptake in North Atlantic coastal  
1060 waters. *Limnol Oceanogr* 62:2538–2549.
- 1061 67. Widner B, Mulholland MR, Mopper K. 2016. Distribution, Sources, and Sinks of Cyanate  
1062 in the Coastal North Atlantic Ocean. *Environ Sci Technol Lett* 3:297–302.
- 1063 68. Henson MW, Hanssen J, Spooner G, Fleming P, Pukonen M, Stahr F, Thrash JC. 2018.

- 1064 Nutrient dynamics and stream order influence microbial community patterns along a 2914  
1065 kilometer transect of the Mississippi River. *Limnol Oceanogr* 63:1837–1855.
- 1066 69. Apprill A, McNally S, Parsons R, Weber L. 2015. Minor revision to V4 region SSU rRNA  
1067 806R gene primer greatly increases detection of SAR11 bacterioplankton. *Aquat Microb*  
1068 *Ecol* 75:129–137.
- 1069 70. Walters W, Hyde ER, Berg-Lyons D, Ackermann G, Humphrey G, Parada A, Gilbert JA,  
1070 Jansson JK, Caporaso JG, Fuhrman JA, Apprill A, Knight R. 2016. Improved Bacterial 16S  
1071 rRNA Gene (V4 and V4-5) and Fungal Internal Transcribed Spacer Marker Gene Primers  
1072 for Microbial Community Surveys. *mSystems* 1:e00009–15.
- 1073 71. Schloss PD, Westcott SL, Ryabin T, Hall JR, Hartmann M, Hollister EB, Lesniewski R a.,  
1074 Oakley BB, Parks DH, Robinson CJ, Sahl JW, Stres B, Thallinger GG, Van Horn DJ,  
1075 Weber CF. 2009. Introducing mothur: Open-source, platform-independent, community-  
1076 supported software for describing and comparing microbial communities. *Appl Environ*  
1077 *Microbiol* 75:7537–7541.
- 1078 72. Pruesse E, Quast C, Knittel K, Fuchs BM, Ludwig W, Peplies J, Glockner FO, Glöckner  
1079 FO. 2007. SILVA: a comprehensive online resource for quality checked and aligned  
1080 ribosomal RNA sequence data compatible with ARB. *Nucleic Acids Res* 35:7188–7196.
- 1081 73. Quast C, Pruesse E, Yilmaz P, Gerken J, Schweer T, Yarza P, Peplies J, Glöckner FO.  
1082 2013. The SILVA ribosomal RNA gene database project: Improved data processing and  
1083 web-based tools. *Nucleic Acids Res* 41:590–596.
- 1084 74. Eren AM, Borisy GG, Huse SM, Mark Welch JL. 2014. Oligotyping analysis of the human  
1085 oral microbiome. *Proc Natl Acad Sci U S A* 111:E2875–84.
- 1086 75. Fujimoto M, Cavaletto J, Liebig JR, McCarthy A, Vanderploeg HA, Deneff VJ. 2016.  
1087 Spatiotemporal distribution of bacterioplankton functional groups along a freshwater  
1088 estuary to pelagic gradient in Lake Michigan. *J Great Lakes Res* 42:1036–1048.
- 1089 76. Cole JR, Wang Q, Fish JA, Chai B, McGarrell DM, Sun Y, Brown CT, Porras-Alfaro A,  
1090 Kuske CR, Tiedje JM. 2014. Ribosomal Database Project: data and tools for high  
1091 throughput rRNA analysis. *Nucleic Acids Res* 42:D633–42.
- 1092 77. Team RC. 2017. R Core Team (2017). R: A language and environment for statistical  
1093 computing. R Found Stat Comput Vienna, Austria URL <http://www.R-project.org/>, page R  
1094 Foundation for Statistical Computing.
- 1095 78. McMurdie PJ, Holmes S. 2013. phyloseq: An R Package for Reproducible Interactive  
1096 Analysis and Graphics of Microbiome Census Data. *PLoS One* 8:e61217.
- 1097 79. Camacho C, Coulouris G, Avagyan V, Ma N, Papadopoulos J, Bealer K, Madden TL. 2009.  
1098 BLAST+: architecture and applications. *BMC Bioinformatics* 10:421.
- 1099 80. Edgar RC. 2004. MUSCLE: multiple sequence alignment with high accuracy and high

- 1100 throughput. *Nucleic Acids Res* 32:1792–1797.
- 1101 81. Capella-Gutiérrez S, Silla-Martínez JM, Gabaldón T. 2009. trimAl: a tool for automated  
1102 alignment trimming in large-scale phylogenetic analyses. *Bioinformatics* 25:1972–1973.
- 1103 82. Nguyen L-T, Schmidt HA, von Haeseler A, Minh BQ. 2015. IQ-TREE: a fast and effective  
1104 stochastic algorithm for estimating maximum-likelihood phylogenies. *Mol Biol Evol*  
1105 32:268–274.
- 1106 83. Hoang DT, Chernomor O, von Haeseler A, Minh BQ, Vinh LS. 2018. UFBoot2: Improving  
1107 the Ultrafast Bootstrap Approximation. *Mol Biol Evol* 35:518–522.
- 1108 84. Junier T, Zdobnov EM. 2010. The Newick utilities: high-throughput phylogenetic tree  
1109 processing in the UNIX shell. *Bioinformatics* 26:1669–1670.
- 1110 85. Han MV, Zmasek CM. 2009. phyloXML: XML for evolutionary biology and comparative  
1111 genomics. *BMC Bioinformatics* 10:356.
- 1112 86. Stingl U, Cho JC, Foo W, Vergin KL, Lanoil B, Giovannoni SJ. 2008. Dilution-to-  
1113 extinction culturing of psychrotolerant planktonic bacteria from permanently ice-covered  
1114 lakes in the McMurdo Dry Valleys, Antarctica. *Microb Ecol* 55:395–405.
- 1115 87. Page KA, Connon SA, Giovannoni SJ. 2004. Representative freshwater bacterioplankton  
1116 isolated from Crater Lake, Oregon. *Appl Environ Microbiol* 70:6542–6550.
- 1117 88. Noell SE, Giovannoni SJ. 2019. SAR11 bacteria have a high affinity and multifunctional  
1118 glycine betaine transporter. *Environ Microbiol* 21:2559–2575.
- 1119 89. Thume K, Gebser B, Chen L, Meyer N, Kieber DJ, Pohnert G. 2018. The metabolite  
1120 dimethylsulfoxonium propionate extends the marine organosulfur cycle. *Nature* 563:412–  
1121 415.
- 1122 90. Asher EC, Dacey JWH, Stukel M, Long MC, Tortell PD. 2017. Processes driving seasonal  
1123 variability in DMS, DMSP, and DMSO concentrations and turnover in coastal Antarctic  
1124 waters. *Limnol Oceanogr* 62:104–124.
- 1125 91. Mizuno CM, Rodriguez-Valera F, Ghai R. 2015. Genomes of planktonic Acidimicrobiales:  
1126 widening horizons for marine Actinobacteria by metagenomics. *MBio* 6:e02083–14.
- 1127 92. Lee J, Kwon KK, Lim S-I, Song J, Choi AR, Yang S-H, Jung K-H, Lee J-H, Kang SG, Oh  
1128 H-M, Cho JC. 2019. Isolation, cultivation, and genome analysis of proteorhodopsin-  
1129 containing SAR116-clade strain *Candidatus Puniceispirillum marinum* IMCC1322. *J*  
1130 *Microbiol* 57:676–687.
- 1131 93. Kitzinger K, Padilla CC, Marchant HK, Hach PF, Herbold CW, Kidane AT, Könneke M,  
1132 Littmann S, Mooshammer M, Niggemann J, Petrov S, Richter A, Stewart FJ, Wagner M,  
1133 Kuypers MMM, Bristow LA. 2019. Cyanate and urea are substrates for nitrification by  
1134 Thaumarchaeota in the marine environment. *Nat Microbiol* 4:234–243.



- 1135 94. Kamennaya NA, Post AF. 2011. Characterization of cyanate metabolism in marine  
1136 *Synechococcus* and *Prochlorococcus* spp. *Appl Environ Microbiol* 77:291–301.
- 1137 95. Eren AM, Maignien L, Sul WJ, Murphy LG, Grim SL, Morrison HG, Sogin ML. 2013.  
1138 Oligotyping: Differentiating between closely related microbial taxa using 16S rRNA gene  
1139 data. *Methods Ecol Evol* 4:1111–1119.
- 1140 96. Needham DM, Fuhrman JA. 2016. Pronounced daily succession of phytoplankton, archaea  
1141 and bacteria following a spring bloom. *Nat Microbiol* 1:16005.
- 1142 97. Campbell BJ, Yu L, Heidelberg JF, Kirchman DL. 2011. Activity of abundant and rare  
1143 bacteria in a coastal ocean. *Proc Natl Acad Sci U S A* 108:12776–12781.
- 1144 98. Oh HM, Kwon KK, Kang I, Kang SG, Lee JH, Kim SJ, Cho JC. 2010. Complete genome  
1145 sequence of “*Candidatus puniceispirillum marinum*” IMCC1322, a representative of the  
1146 SAR116 clade in the Alphaproteobacteria. *J Bacteriol* 192:3240–3241.
- 1147 99. Fegatella F, Lim J, Kjelleberg S, Cavicchioli R. 1998. Implications of rRNA operon copy  
1148 number and ribosome content in the marine oligotrophic ultramicrobacterium  
1149 *Sphingomonas* sp. strain RB2256. *Appl Environ Microbiol* 64:4433–4438.
- 1150 100. Acinas SG, Marcelino LA, Klepac-Ceraj V, Polz MF. 2004. Divergence and redundancy  
1151 of 16S rRNA sequences in genomes with multiple *rrn* operons. *J Bacteriol* 186:2629–2635.
- 1152 101. Pedrós-Alió C. 2012. The rare bacterial biosphere. *Ann Rev Mar Sci* 4:449–466.
- 1153 102. Martiny AC. 2019. High proportions of bacteria are culturable across major biomes.  
1154 *ISME J* 13:2125–2128.
- 1155 103. Parada AE, Needham DM, Fuhrman JA. 2015. Every base matters: assessing small  
1156 subunit rRNA primers for marine microbiomes with mock communities, time series and  
1157 global field samples. *Environ Microbiol* 18:1403–1414.
- 1158 104. Del Giorgio PA, Gasol JM. 2008. Physiological structure and single-cell activity in  
1159 marine bacterioplankton. *Microbial Ecology of the Oceans* 2:243–298.
- 1160 105. Malmstrom RR, Kiene RP, Cottrell MT, Kirchman DL. 2004. Contribution of SAR11  
1161 bacteria to dissolved dimethylsulfoniopropionate and amino acid uptake in the North  
1162 Atlantic Ocean. *Appl Environ Microbiol* 70:4129–4135.
- 1163 106. Malmstrom RR, Cottrell MT, Elifantz H, Kirchman DL. 2005. Biomass production and  
1164 assimilation of dissolved organic matter by SAR11 bacteria in the Northwest Atlantic  
1165 Ocean. *Appl Environ Microbiol* 71:2979–2986.
- 1166 107. Piwosz K, Salcher MM, Zeder M, Ameryk A, Pernthaler J. 2013. Seasonal dynamics and  
1167 activity of typical freshwater bacteria in brackish waters of the Gulf of Gdańsk. *Limnol*  
1168 *Oceanogr* 58:817–826.

- 1169 108. Laghdass M, Catala P, Caparros J, Oriol L, Lebaron P, Obernosterer I. 2012. High  
1170 contribution of SAR11 to microbial activity in the north west Mediterranean Sea. *Microb*  
1171 *Ecol* 63:324–333.
- 1172 109. Salter I, Galand PE, Fagervold SK, Lebaron P, Obernosterer I, Oliver MJ, Suzuki MT,  
1173 Tricoire C. 2015. Seasonal dynamics of active SAR11 ecotypes in the oligotrophic  
1174 Northwest Mediterranean Sea. *ISME J* 9:347–360.
- 1175 110. Leizeaga A, Estrany M, Forn I, Sebastián M. 2017. Using Click-Chemistry for  
1176 Visualizing in Situ Changes of Translational Activity in Planktonic Marine Bacteria. *Front*  
1177 *Microbiol* 8:2360.
- 1178 111. Kirchman DL. 2016. Growth Rates of Microbes in the Oceans. *Ann Rev Mar Sci* 8:285–  
1179 309.
- 1180 112. Samo TJ, Smriga S, Malfatti F, Sherwood BP, Azam F. 2014. Broad distribution and high  
1181 proportion of protein synthesis active marine bacteria revealed by click chemistry at the  
1182 single cell level. *Frontiers in Marine Science* 1:48.
- 1183 113. Smriga S, Samo TJ, Malfatti F, Villareal J, Azam F. 2014. Individual cell DNA synthesis  
1184 within natural marine bacterial assemblages as detected by “click”chemistry. *Aquat Microb*  
1185 *Ecol* 72:269–280.
- 1186 114. Bradley JA, Amend JP, LaRowe DE. 2019. Survival of the fewest: Microbial dormancy  
1187 and maintenance in marine sediments through deep time. *Geobiology* 17:43–59.
- 1188 115. Zhao Y, Temperton B, Thrash JC, Schwalbach MS, Vergin KL, Landry ZC, Ellisman M,  
1189 Deerinck T, Sullivan MB, Giovannoni SJ. 2013. Abundant SAR11 viruses in the ocean.  
1190 *Nature* 494:357–360.
- 1191 116. Martinez-Hernandez F, Fornas Ò, Lluesma Gomez M, Garcia-Heredia I, Maestre-  
1192 Carballa L, López-Pérez M, Haro-Moreno JM, Rodriguez-Valera F, Martinez-Garcia M.  
1193 2018. Single-cell genomics uncover Pelagibacter as the putative host of the extremely  
1194 abundant uncultured 37-F6 viral population in the ocean. *ISME J* 13:232–236.
- 1195 117. Chen L-X, Zhao Y, McMahon KD, Mori JF, Jessen GL, Nelson TC, Warren LA,  
1196 Banfield JF. 2019. Wide Distribution of Phage That Infect Freshwater SAR11 Bacteria.  
1197 *mSystems* 4:e00410–19.
- 1198 118. Thingstad TF, Lignell R. 1997. Theoretical models for the control of bacterial growth  
1199 rate, abundance, diversity and carbon demand. *Aquat Microb Ecol* 13:19–27.
- 1200 119. Våge S, Storesund JE, Thingstad TF. 2013. SAR11 viruses and defensive host strains.  
1201 *Nature* 499:E3–4.
- 1202 120. Thingstad TF, Vage S, Storesund JE, Sandaa RA, Giske J. 2014. A theoretical analysis of  
1203 how strain-specific viruses can control microbial species diversity. *Proc Natl Acad Sci U S*  
1204 *A* 111:7813–7818.

- 1205 121. Giovannoni S, Temperton B, Zhao Y. 2013. Giovannoni et al. reply. *Nature* 499:E4–E5.
- 1206 122. Alonso-Sáez L, Morán XAG, Clokie MR. 2018. Low activity of lytic pelagiphages in  
1207 coastal marine waters. *ISME J* 12:2100–2102.
- 1208 123. Chapman-McQuiston E, Wu XL. 2008. Stochastic receptor expression allows sensitive  
1209 bacteria to evade phage attack. Part I: experiments. *Biophys J* 94:4525–4536.
- 1210 124. Bertozzi Silva J, Storms Z, Sauvageau D. 2016. Host receptors for bacteriophage  
1211 adsorption. *FEMS Microbiol Lett* 363:fnw002.
- 1212 125. Williamson SJ, Houchin LA, McDaniel L, Paul JH. 2002. Seasonal variation in lysogeny  
1213 as depicted by prophage induction in Tampa Bay, Florida. *Appl Environ Microbiol*  
1214 68:4307–4314.
- 1215 126. Stough JMA, Tang X, Krausfeldt LE, Steffen MM, Gao G, Boyer GL, Wilhelm SW.  
1216 2017. Molecular prediction of lytic vs lysogenic states for *Microcystis* phage:  
1217 Metatranscriptomic evidence of lysogeny during large bloom events. *PLoS One*  
1218 12:e0184146.
- 1219 127. Zhao Y, Qin F, Zhang R, Giovannoni SJ, Zhang Z, Sun J, Du S, Rensing C. 2019.  
1220 Pelagiphages in the Podoviridae family integrate into host genomes. *Environ Microbiol*  
1221 21:1989–2001.
- 1222 128. Morris RM, Cain KR, Hvorecny KL, Kollman JM. 2020. Lysogenic host–virus  
1223 interactions in SAR11 marine bacteria. *Nature Microbiology* 1–5.
- 1224 129. Warwick-Dugdale J, Buchholz HH, Allen MJ, Temperton B. 2019. Host-hijacking and  
1225 planktonic piracy: how phages command the microbial high seas. *Virology* 16:15.
- 1226 130. Yu Z-C, Chen X-L, Shen Q-T, Zhao D-L, Tang B-L, Su H-N, Wu Z-Y, Qin Q-L, Xie B-  
1227 B, Zhang X-Y, Yu Y, Zhou B-C, Chen B, Zhang Y-Z. 2015. Filamentous phages prevalent  
1228 in *Pseudoalteromonas* spp. confer properties advantageous to host survival in Arctic sea ice.  
1229 *ISME J* 9:871–881.
- 1230 131. Shkoporov AN, Khokhlova EV, Fitzgerald CB, Stockdale SR, Draper LA, Ross RP, Hill  
1231 C. 2018.  $\Phi$ CrAss001 represents the most abundant bacteriophage family in the human gut  
1232 and infects *Bacteroides intestinalis*. *Nat Commun* 9:4781.
- 1233 132. Teira E, Martínez-García S, Lønborg C, Alvarez-Salgado XA. 2009. Growth rates of  
1234 different phylogenetic bacterioplankton groups in a coastal upwelling system. *Environ*  
1235 *Microbiol Rep* 1:545–554.
- 1236 133. Lankiewicz TS, Cottrell MT, Kirchman DL. 2016. Growth rates and rRNA content of  
1237 four marine bacteria in pure cultures and in the Delaware estuary. *ISME J* 10:823–832.
- 1238 134. Ferrera I, Gasol JM, Sebastián M, Hojerová E, Koblížek M. 2011. Comparison of growth  
1239 rates of aerobic anoxygenic phototrophic bacteria and other bacterioplankton groups in

- 1240 coastal Mediterranean waters. *Appl Environ Microbiol* 77:7451–7458.
- 1241 135. Carini P, Campbell EO, Morré J, Sañudo-Wilhelmy SA, Thrash JC, Bennett SE,  
1242 Temperton B, Begley T, Giovannoni SJ. 2014. Discovery of a SAR11 growth requirement  
1243 for thiamin’s pyrimidine precursor and its distribution in the Sargasso Sea. *ISME J* 8:1727–  
1244 1738.
- 1245 136. Grant SR, Church MJ, Ferrón S, Laws EA, Rappé MS. 2019. Elemental Composition,  
1246 Phosphorous Uptake, and Characteristics of Growth of a SAR11 Strain in Batch and  
1247 Continuous Culture. *mSystems* 4:e00218–18.
- 1248 137. Simon M, Azam F. 1989. Protein content and protein synthesis rates of planktonic marine  
1249 bacteria. *Marine ecology progress series Oldendorf* 51:201–213.
- 1250 138. White AE, Giovannoni SJ, Zhao Y, Vergin K, Carlson CA. 2019. Elemental content and  
1251 stoichiometry of SAR11 chemoheterotrophic marine bacteria. *Limnology and*  
1252 *Oceanography Letters* 4:44–51.
- 1253 139. Smith DP, Cameron Thrash J, Nicora CD, Lipton MS, Burnum-Johnson KE, Carini P,  
1254 Smith RD, Giovannoni SJ. 2013. Proteomic and Transcriptomic Analyses of “Candidatus  
1255 *Pelagibacter ubique*” Describe the First PII-Independent Response to Nitrogen Limitation in  
1256 a Free-Living Alphaproteobacterium. *MBio* 4:e00133–12.
- 1257 140. van Vliet S, Dal Co A, Winkler AR, Spriewald S, Stecher B, Ackermann M. 2018.  
1258 Spatially Correlated Gene Expression in Bacterial Groups: The Role of Lineage History,  
1259 Spatial Gradients, and Cell-Cell Interactions. *Cell Syst* 6:496–507.e6.
- 1260

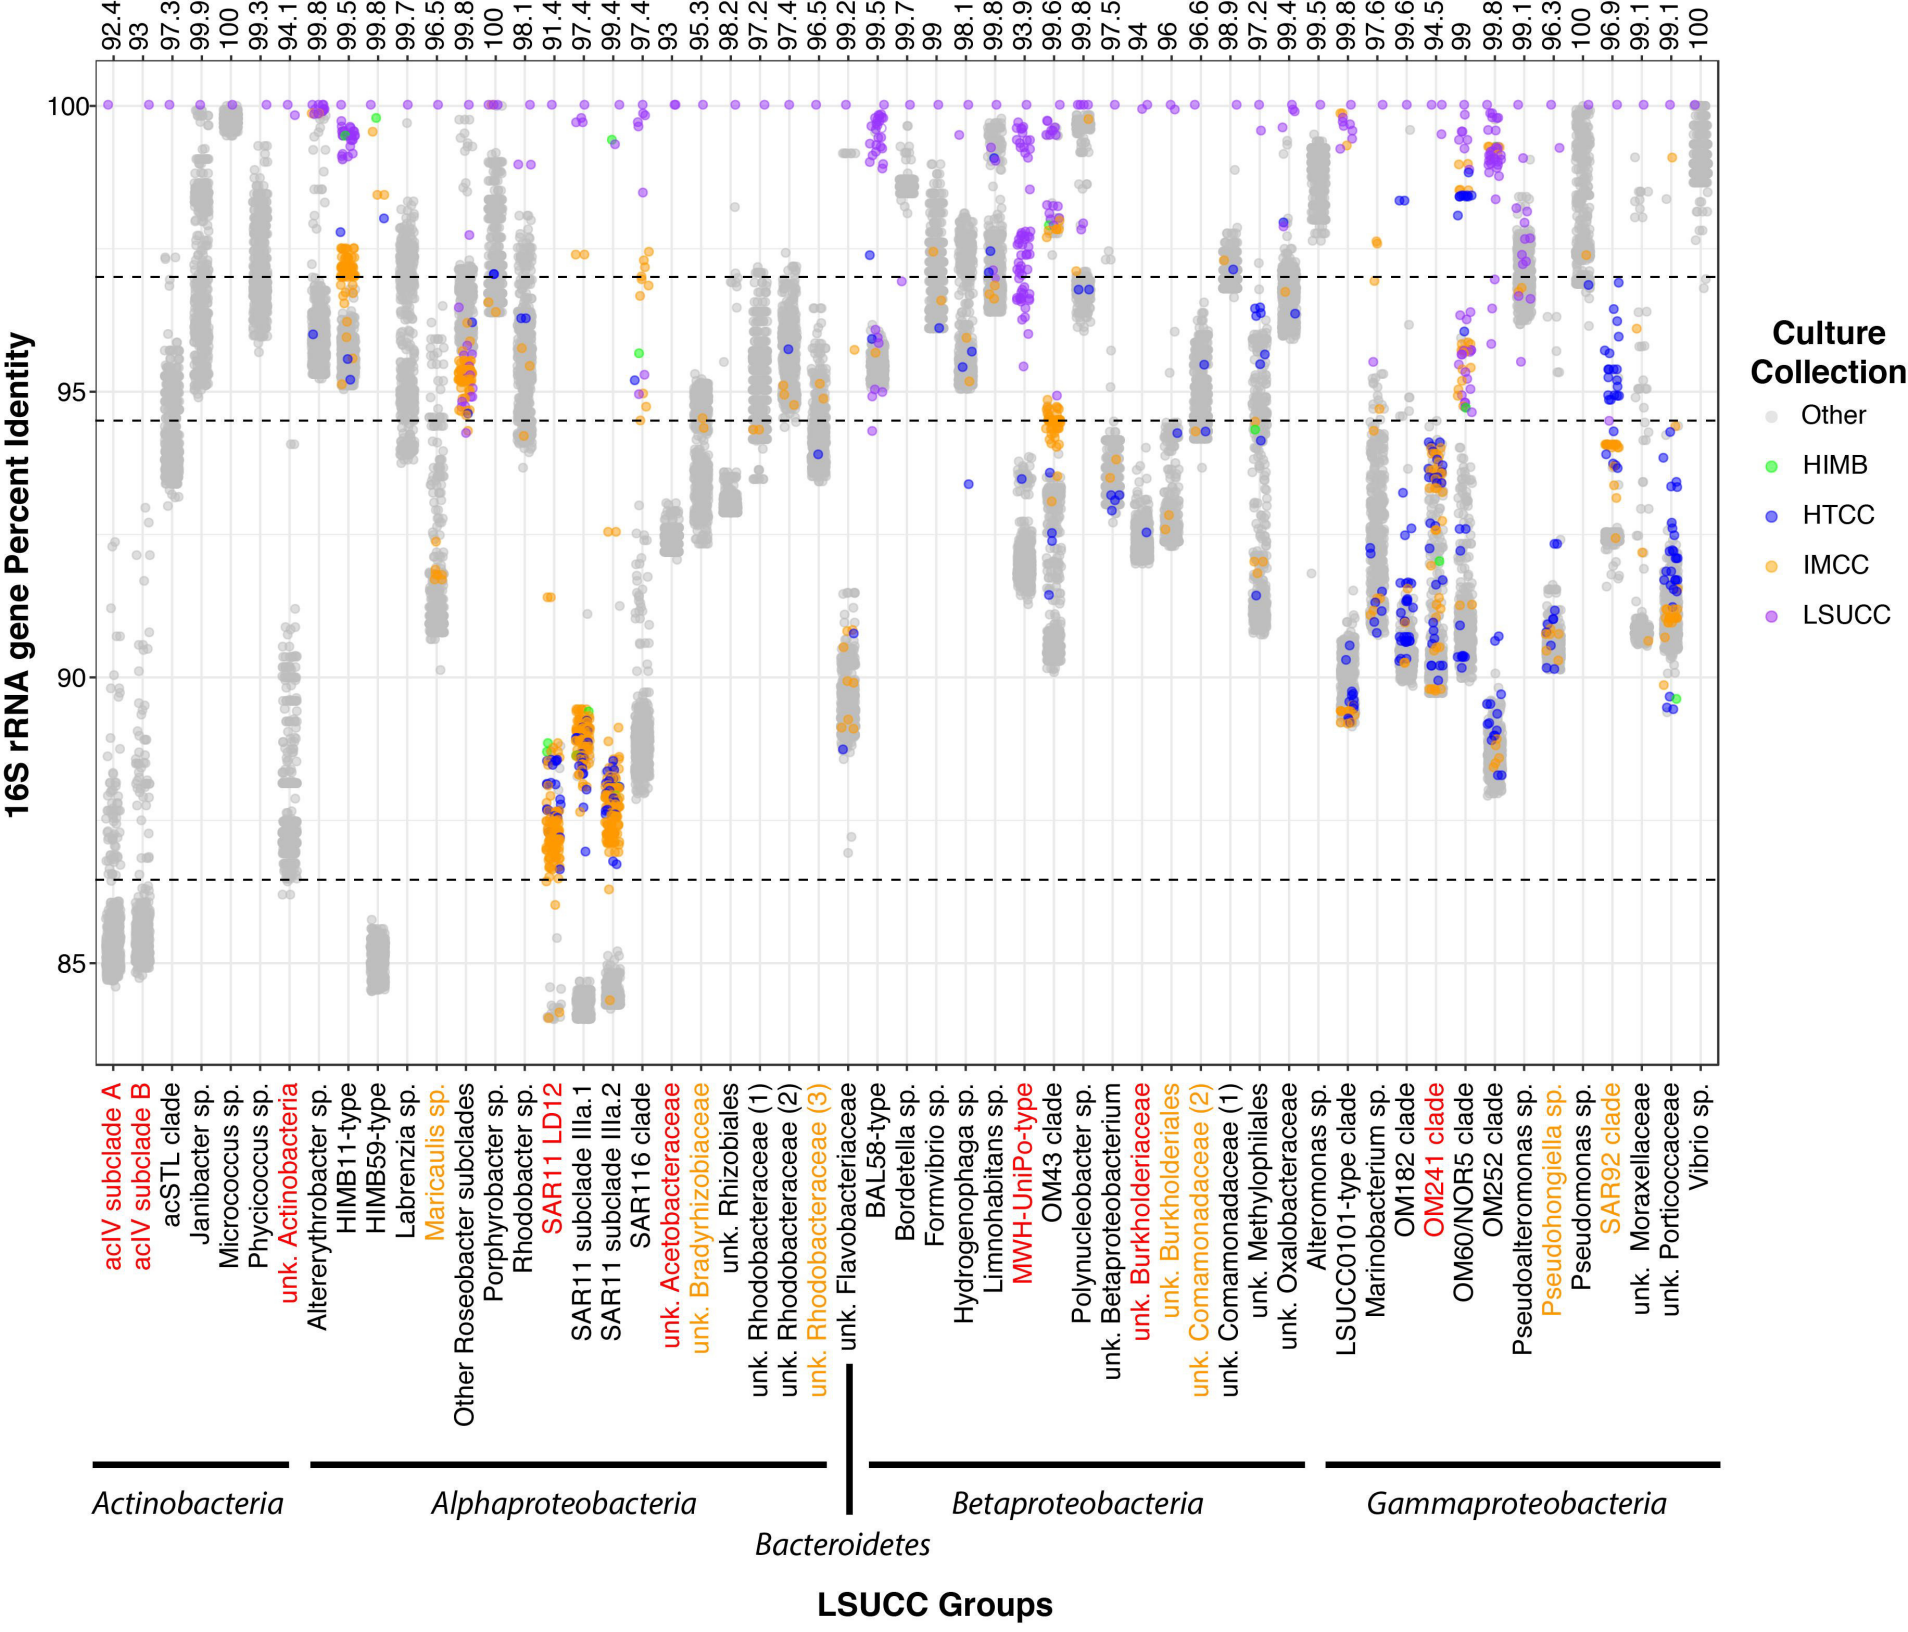



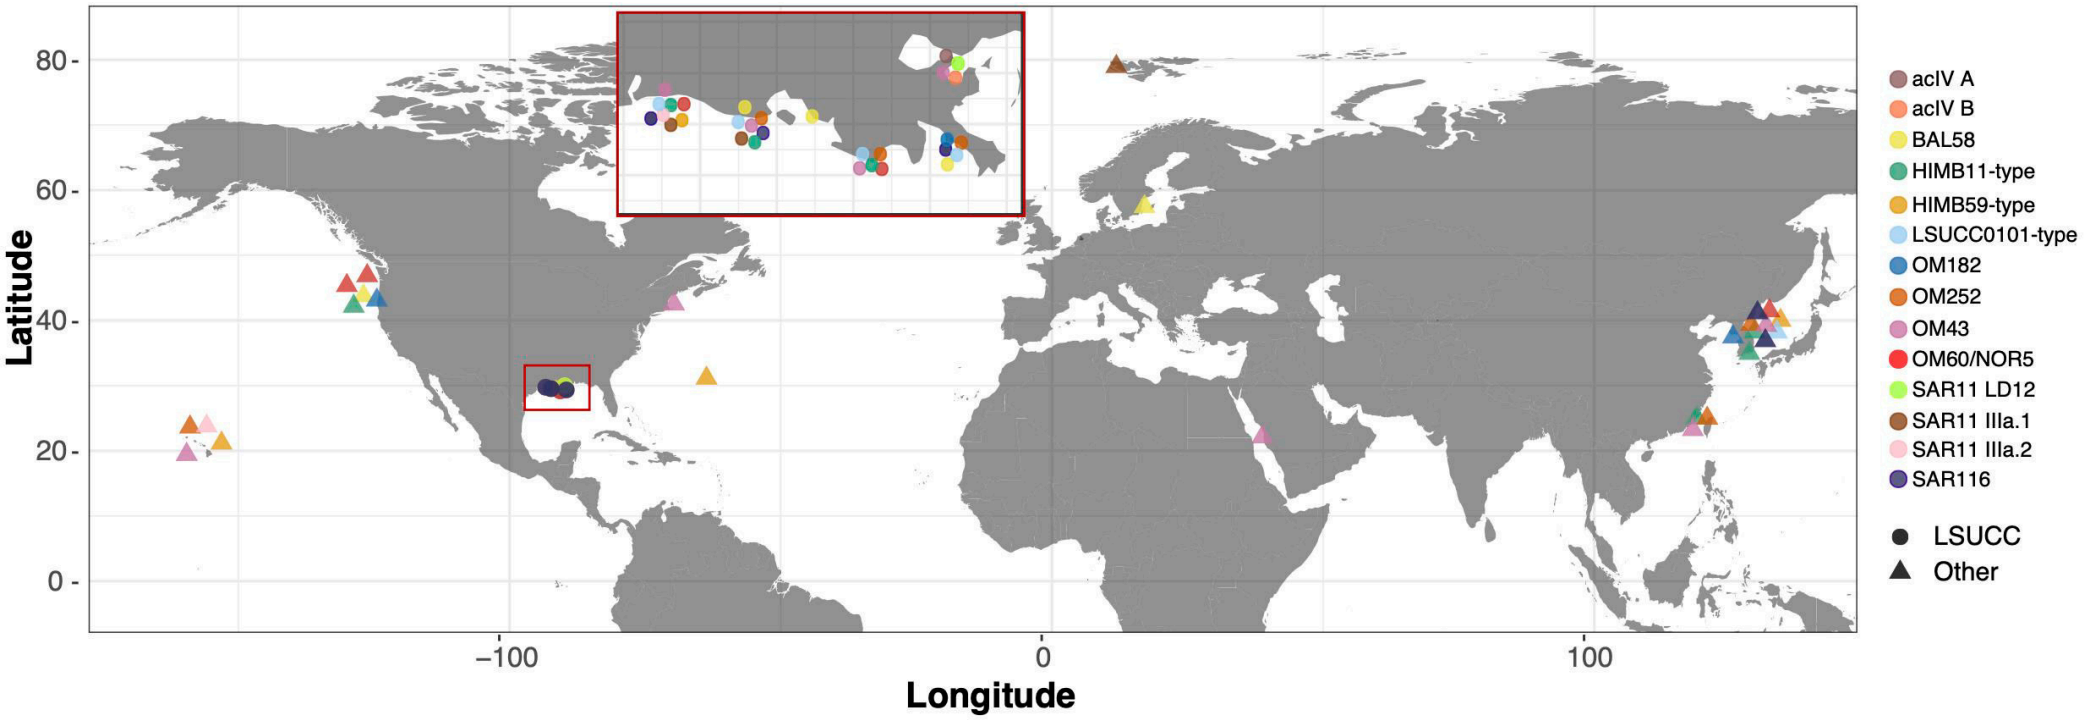

**A**

Relative Abundance

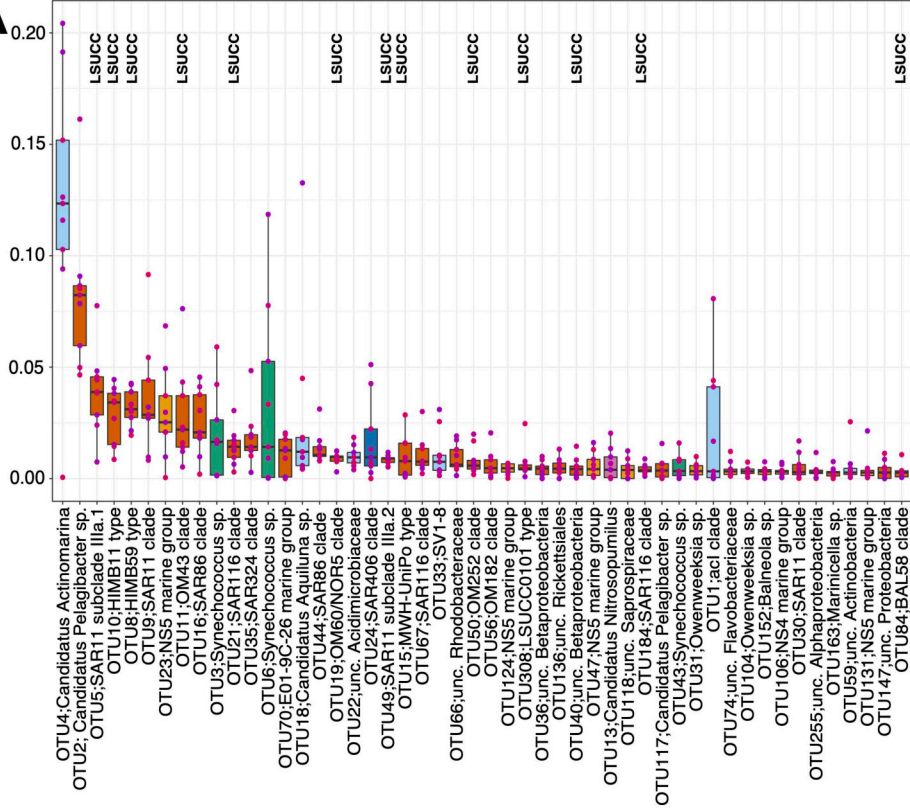**B**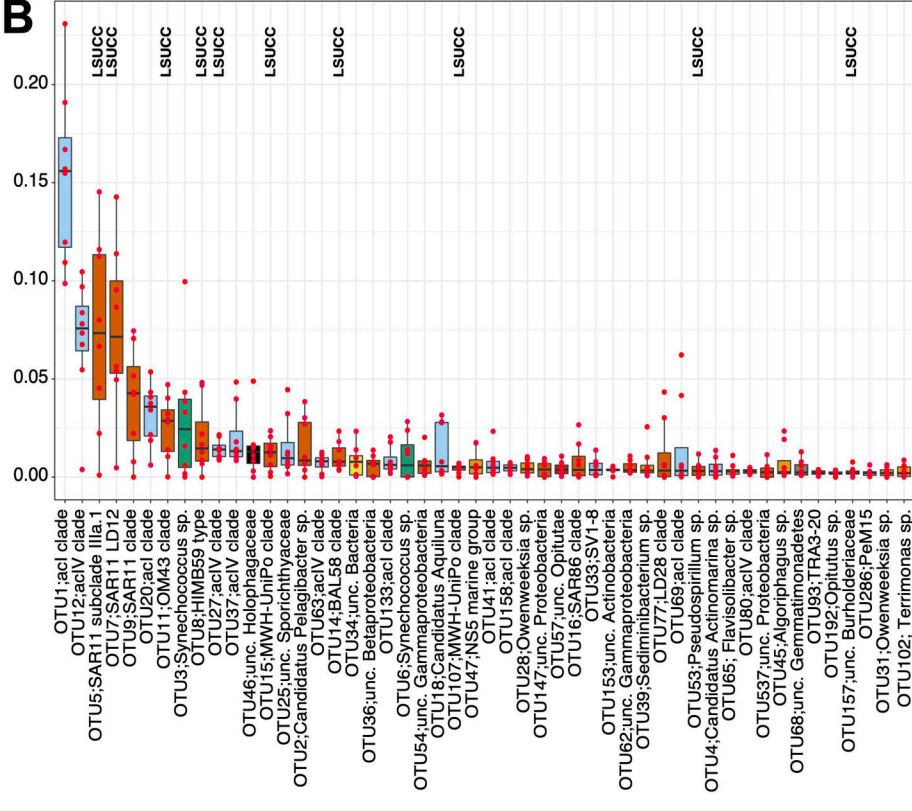

Phylum

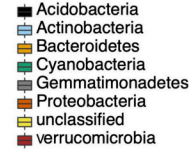

Salinity

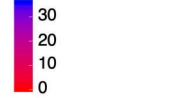

**A**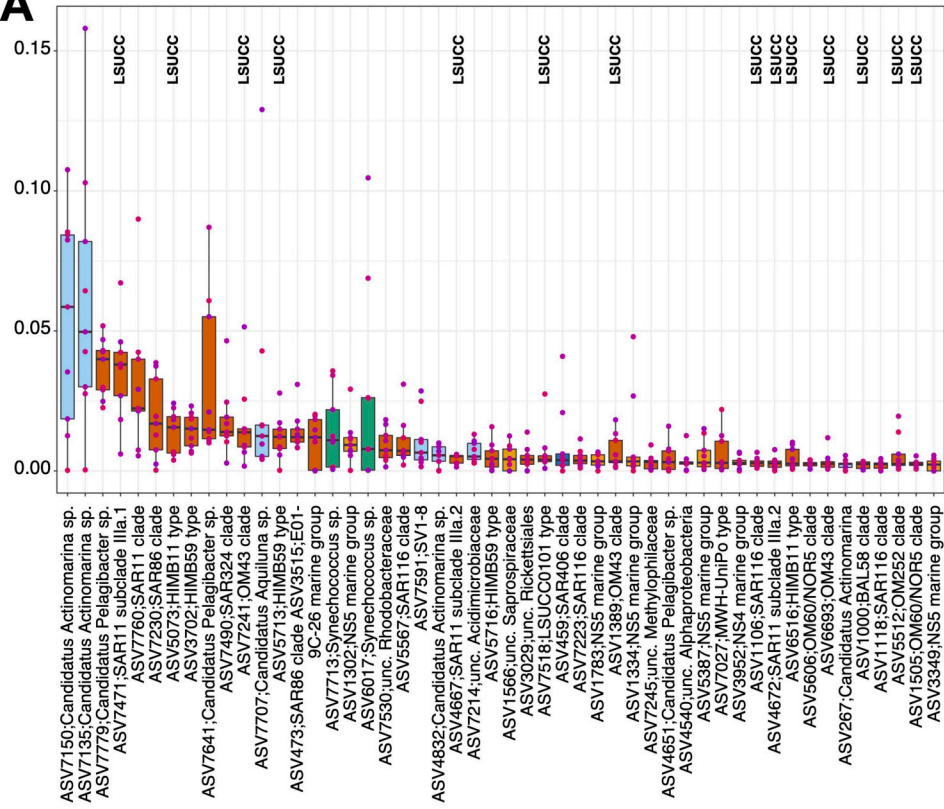**B**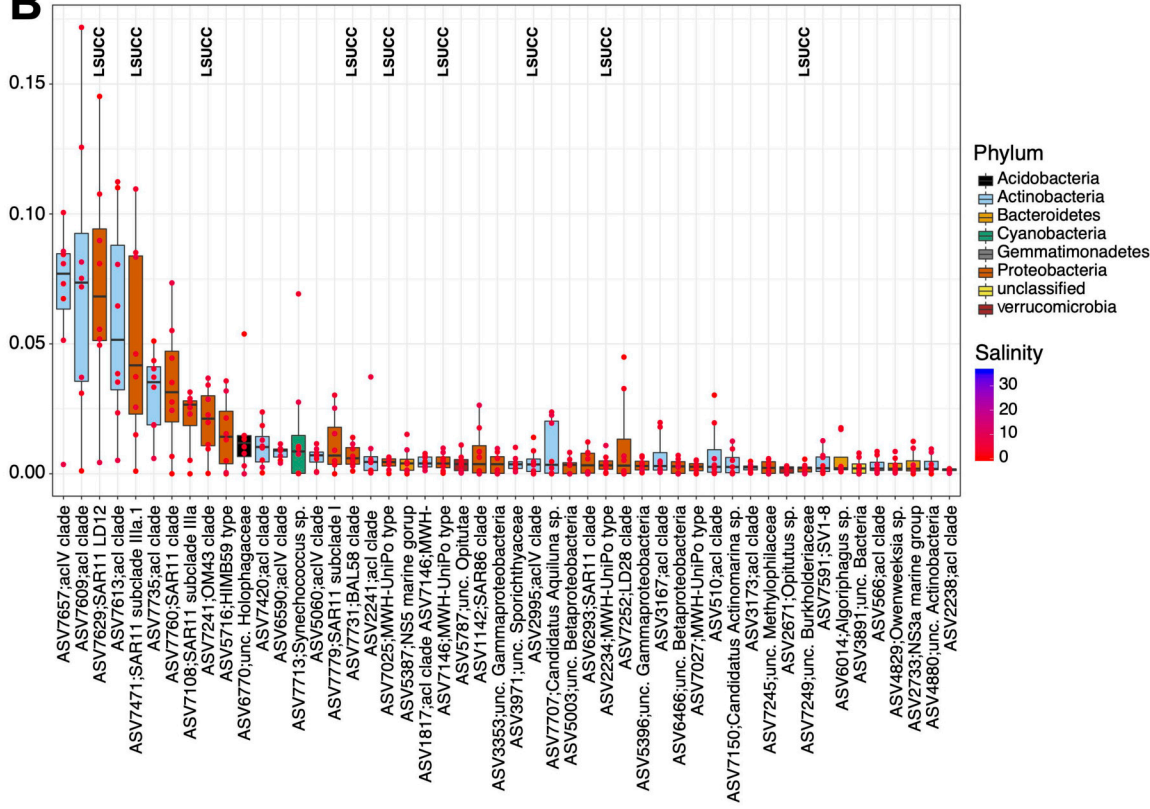

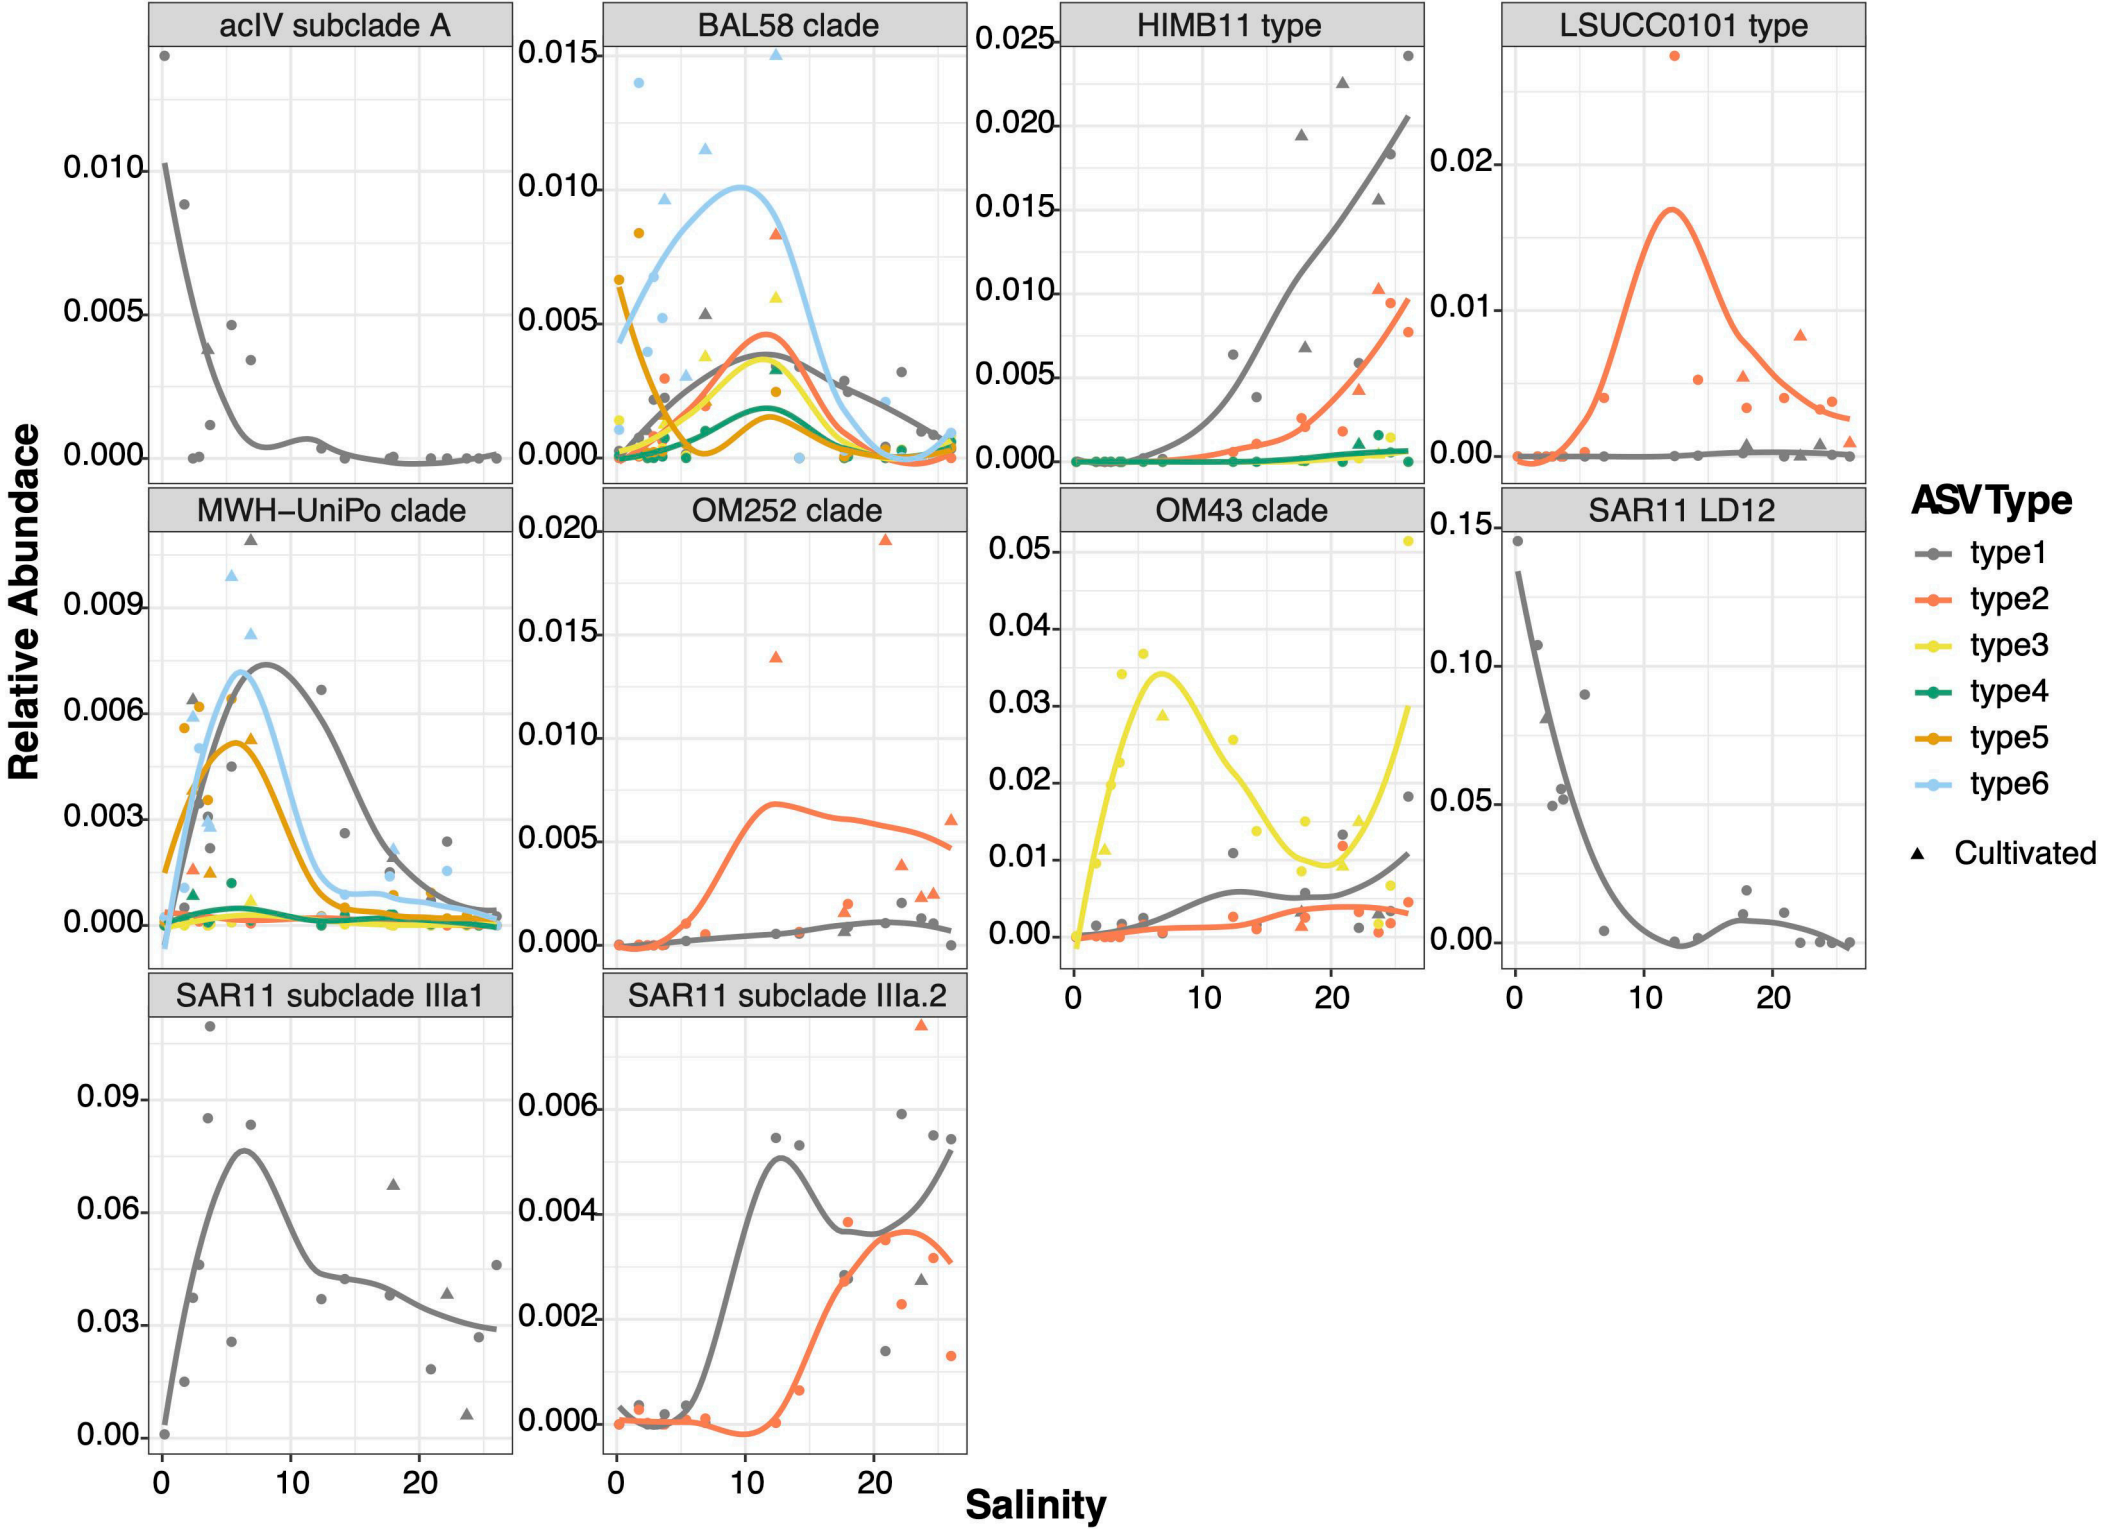



**Step 1: Simulate  $n$  wells**

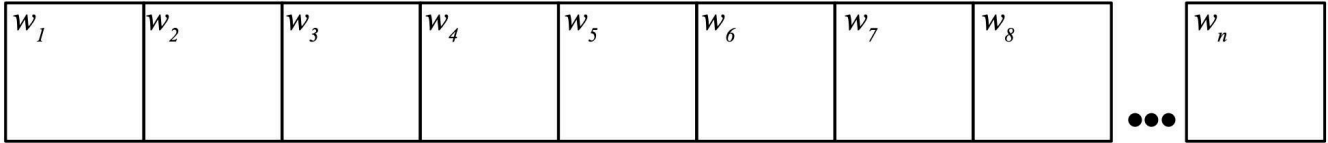

**Step 2: Simulate inoculation of wells from Poisson distribution ( $\lambda$ =inoculum)**

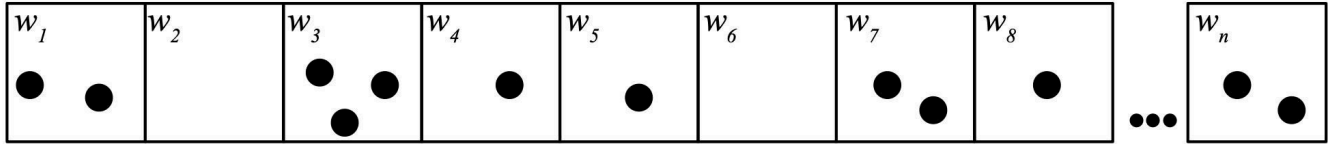

**Step 3: Simulate likelihood of taxon from Binomial distribution ( $n$  = # cells in well,  $p$  = rel. abund)**

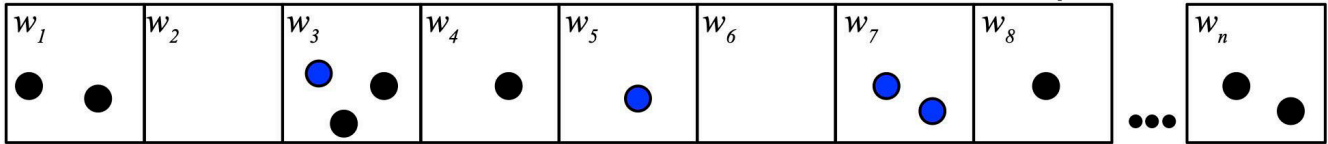

**Step 4: Count positive wells, taxon positive wells, pure wells and taxon pure wells**

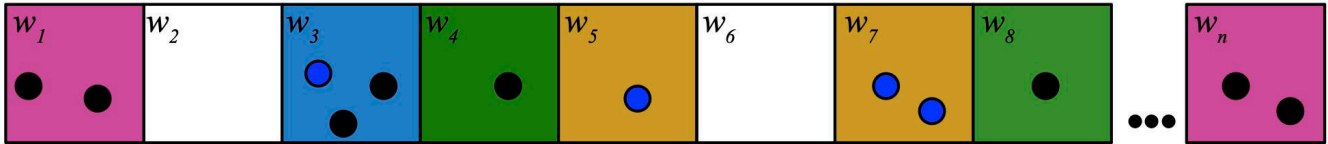

**Step 5: For taxon pure wells, simulate likelihood of viability from Binomial distribution ( $n$  = # cells in well,  $p$  = viability)**

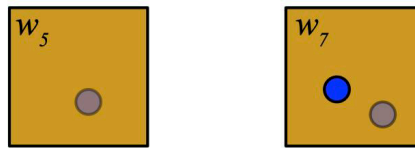

**Step 6: Count wells where viable cells  $\geq 1$**

**Step 7: Bootstrap steps 1-6  $k$  times at different levels of viability,  $0 \leq v \leq 1$**

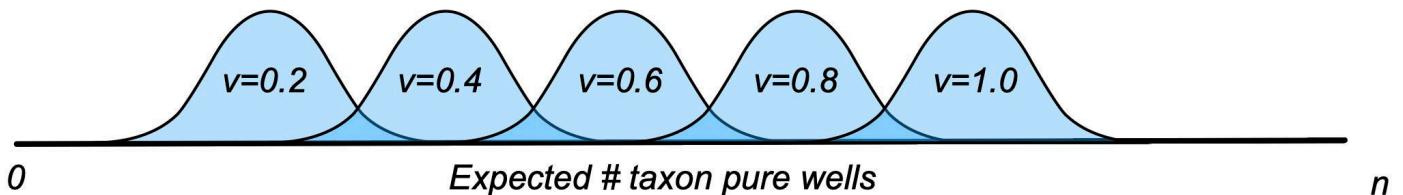

**Step 8: Identify min, max values of  $v$  where # observed wells falls within bootstrapped 95% CI**

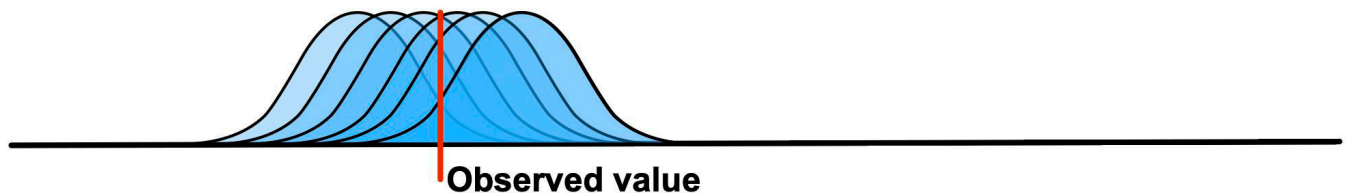



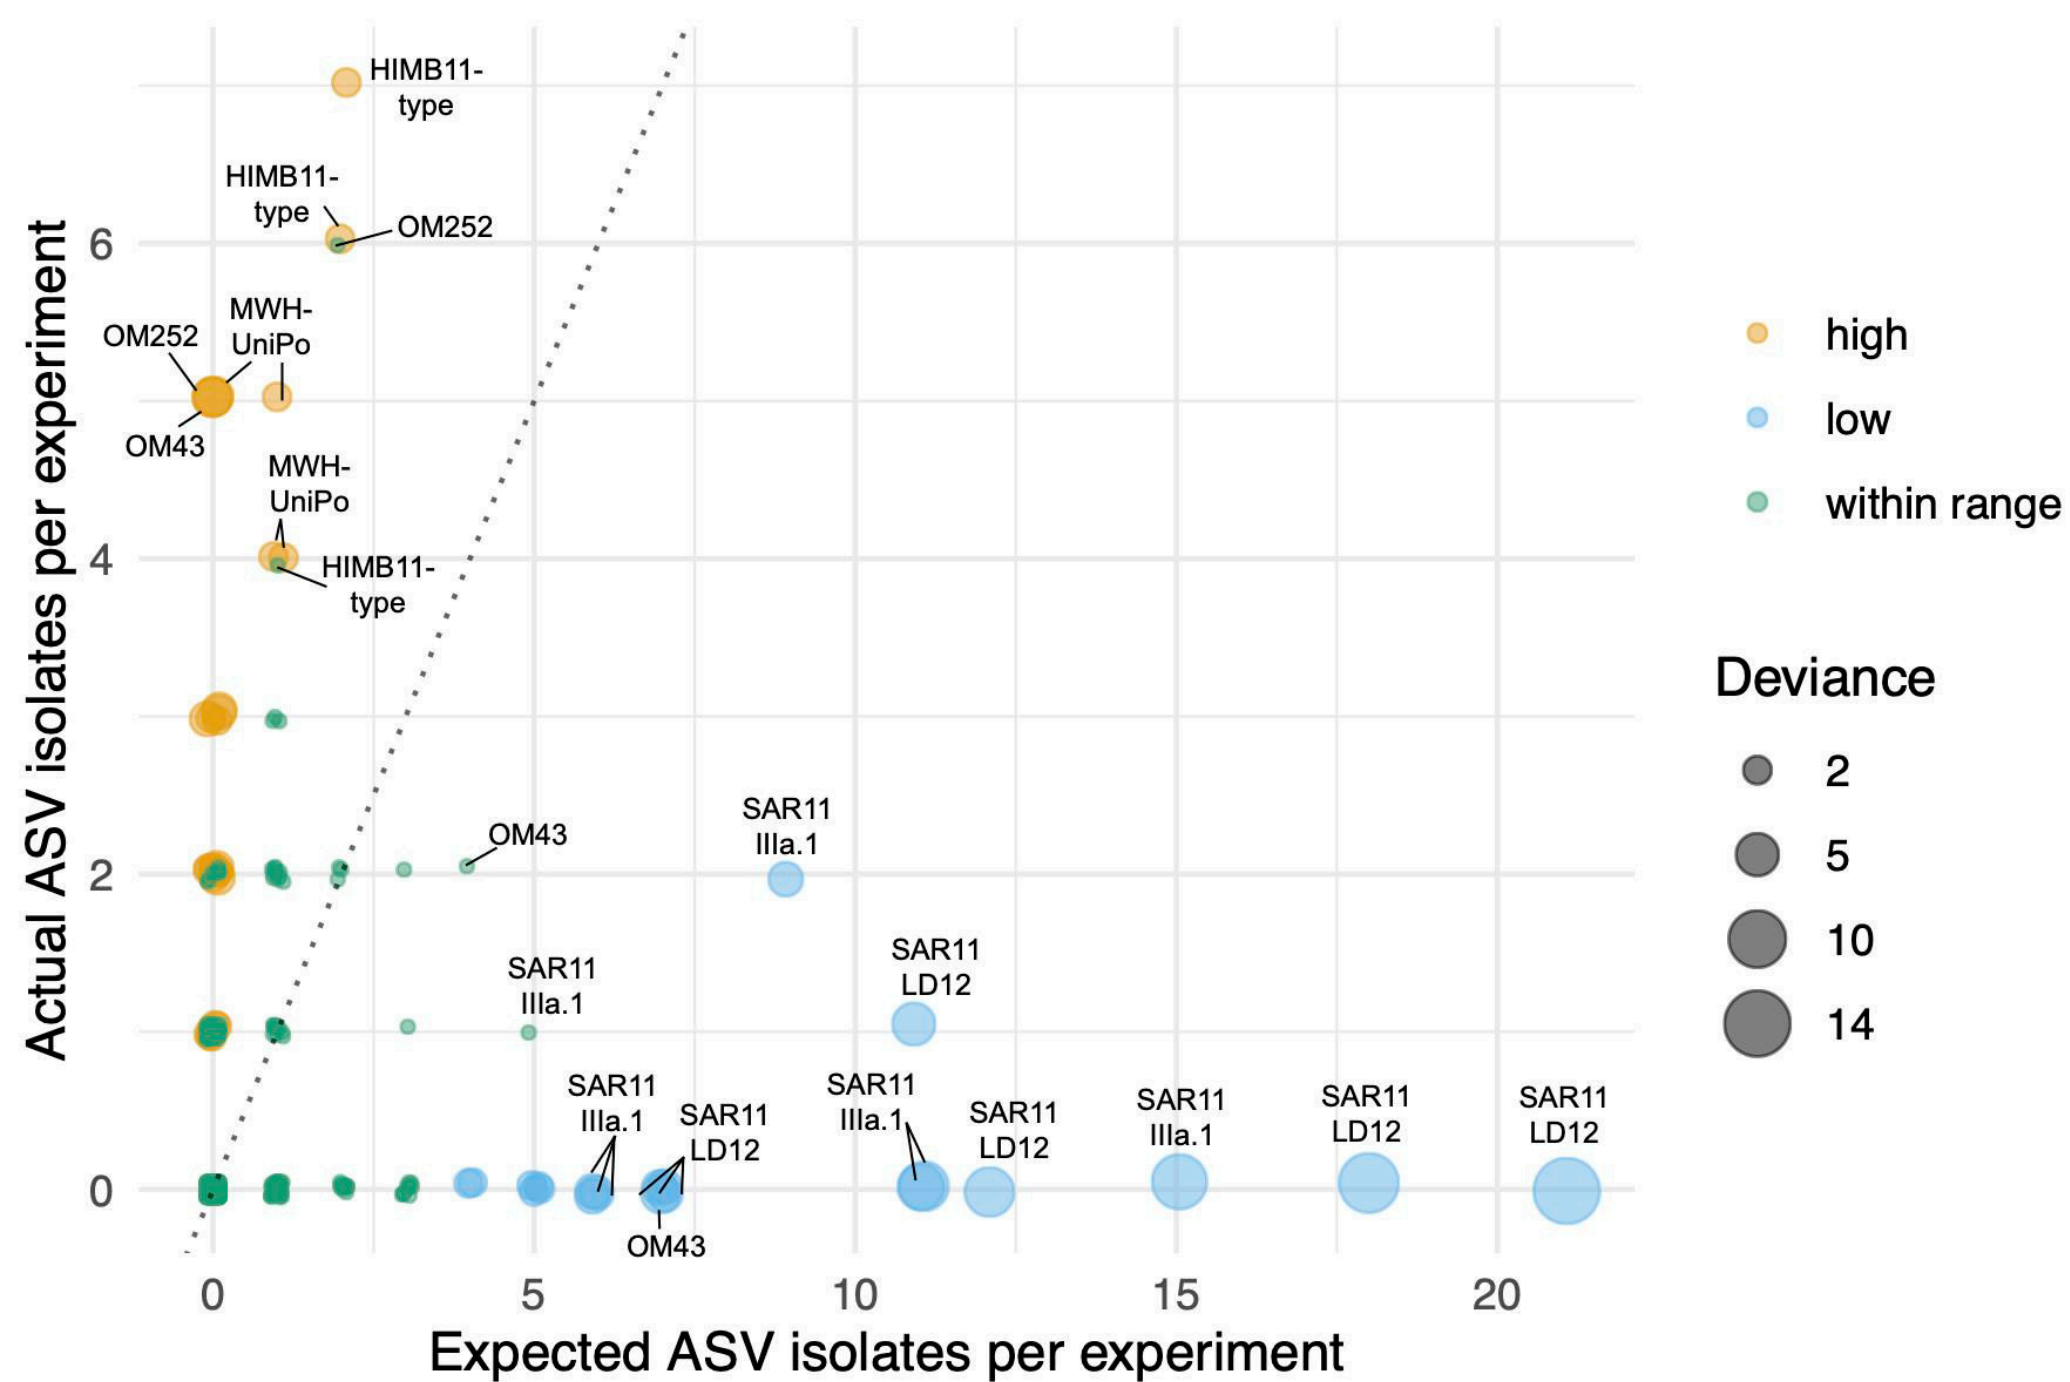

Source: https://www.biorxiv.org/content/10.1101/2020.04.17.046896v3.full.pdf
